# Supplementary material for: The Dsc ubiquitin ligase complex identifies transmembrane degrons to degrade orphaned proteins at the Golgi
Source: PubMed Central journal article supplement (PMC11513148; doi:10.1038/s41467-024-53676-6), 2024-10-26
Supplement: 41467_2024_53676_MOESM1_ESM.pdf [file 41467_2024_53676_MOESM1_ESM.pdf]

## **Supplementary Information for**

### **The Dsc ubiquitin ligase complex identifies transmembrane degrons to degrade orphaned proteins at the Golgi**

The Supplementary information consists of:

Supplementary Figure 1 - 7

Supplementary Tables 1 - 3

Supplementary Methods

# Supplementary Figure 1

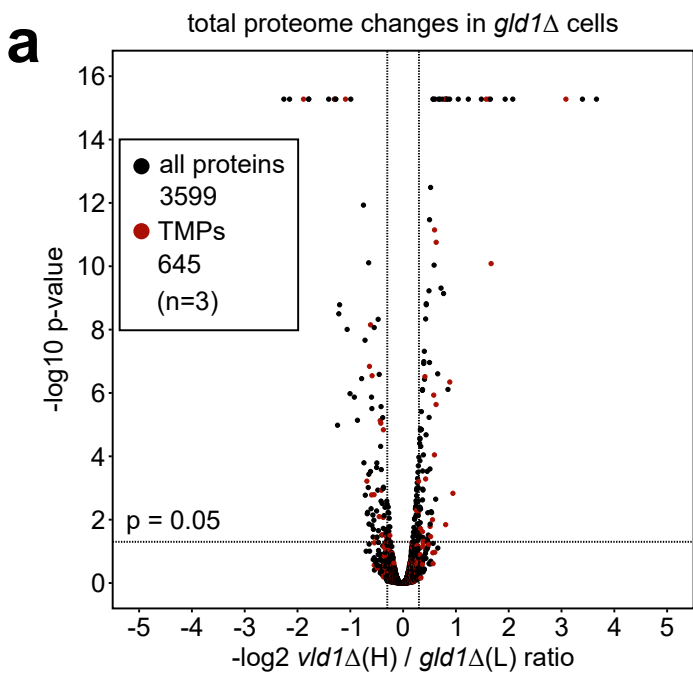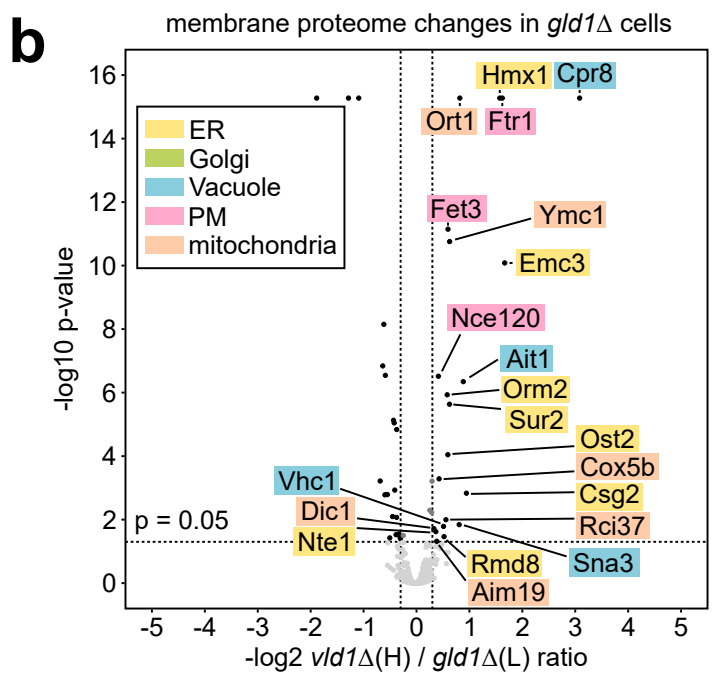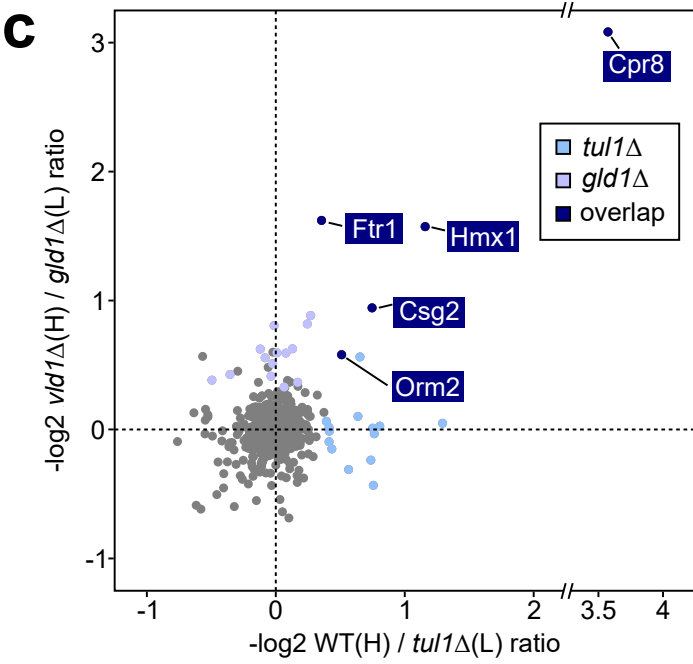

Supplementary Figure 1. **Quantitative proteomic SILAC profiling of the Gld1-Dsc complex**  
**a, b** Volcano plots showing the H/L peptide ratios of proteins from heavy  $^{13}\text{C}_6, ^{15}\text{N}_2$ -L-lysine labeled *vld1Δ* cells against light  $^{12}\text{C}_6, ^{14}\text{N}_2$ -L-lysine L-lysine labeled *gld1Δ* cells **a** total proteome changes and **b** only transmembrane proteins from n=3 independent experiments. See also **Supplementary Data 1, 2. c** Scatter plot of the membrane proteins quantified in WT/*tul1Δ* (x-axis) and in *vld1Δ/gld1Δ* (y-axis), only displaying proteins with  $-\log_2 > -1$ . Membrane proteins that are significantly upregulated ( $-\log_2 \geq 0.3, p \leq 0.05$ ) in both datasets are highlighted. See also **Supplementary Data 3. a-c** The p-values were calculated by using the background based t-test, the adjusted p-values by using the Benjamin-Hochberg method.

# Supplementary Figure 2

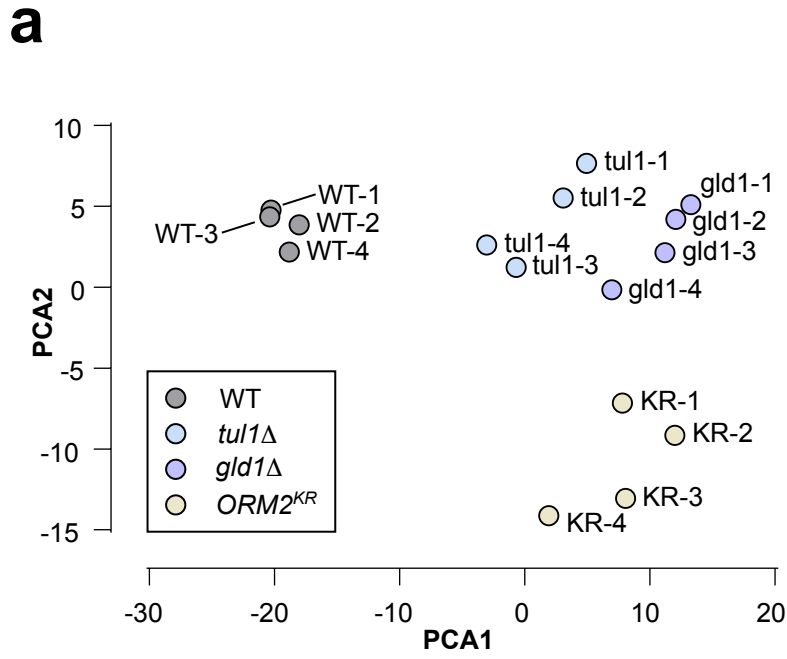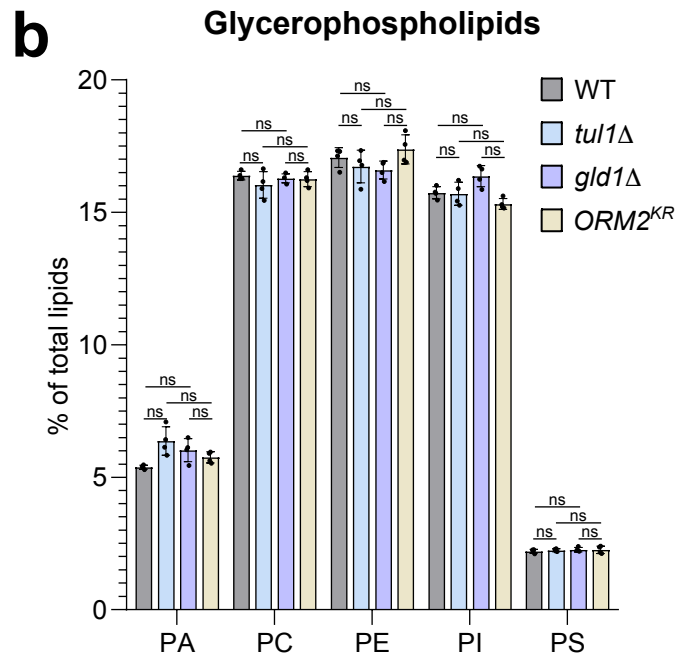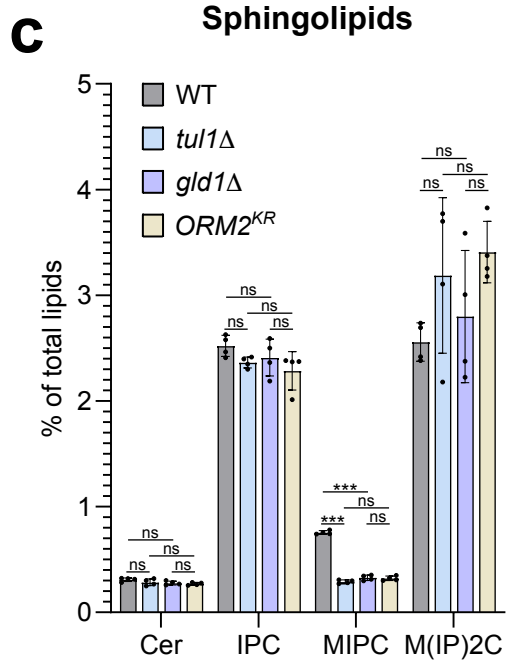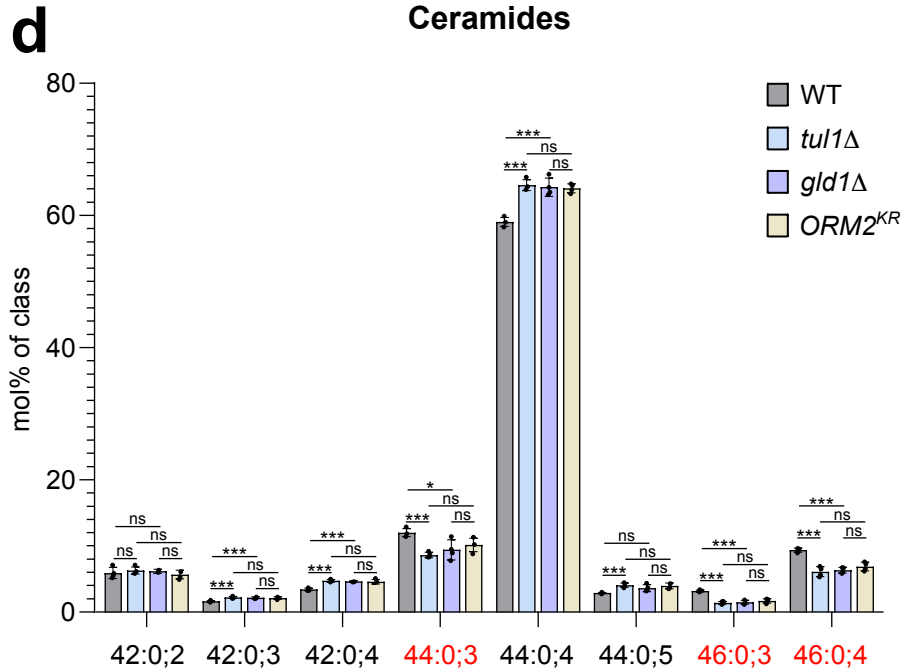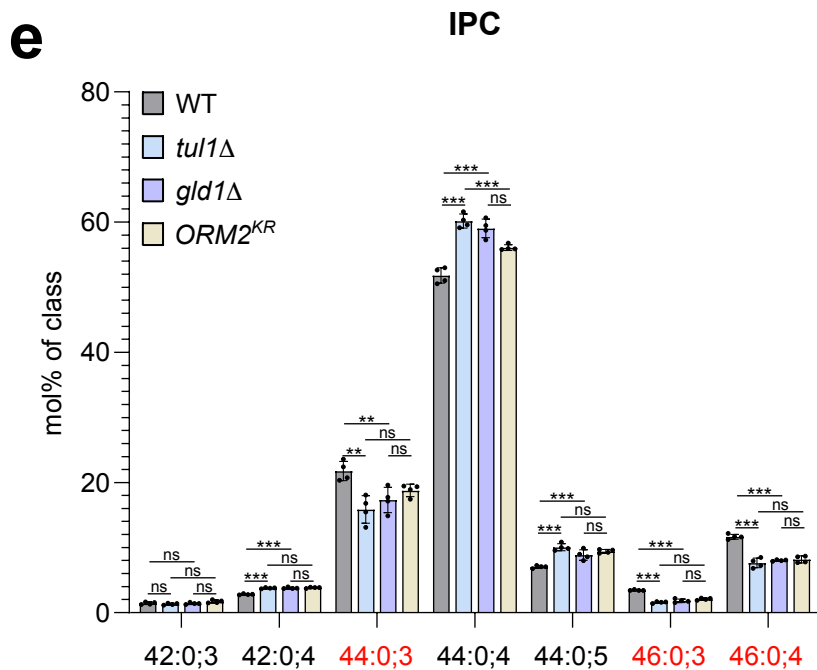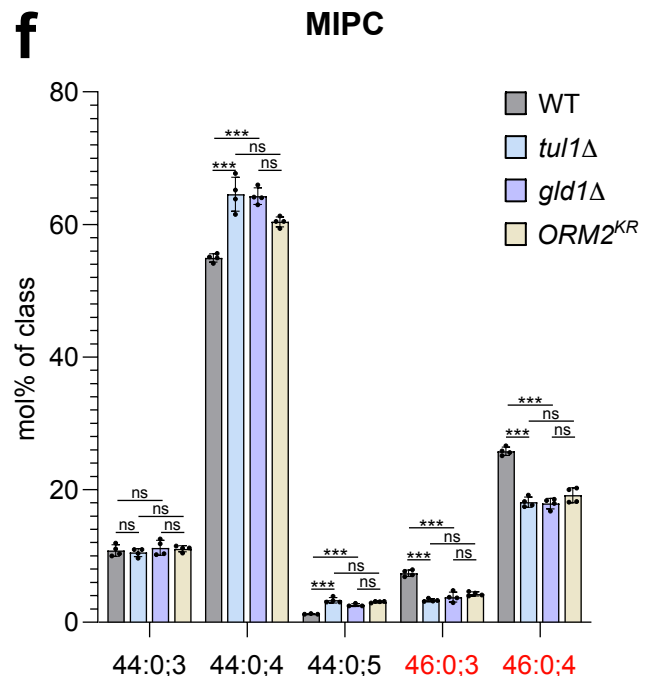

Supplementary Figure 2. **Impact on lipid and sphingolipid synthesis in *tul1Δ*, *gld1Δ*, and *ORM2<sup>KR</sup>* mutant cells**

**a** Principal component analysis of lipid extracts from WT (dark gray), *tul1Δ* (light blue), *gld1Δ* (soft purple), and *ORM2<sup>KR</sup>* (pale yellow) mutant cells. **b** Abundance (in % of total lipids) of phosphatidic acid (PA), phosphatidylcholine (PC), phosphatidylethanolamine (PE), phosphatidylinositol (PI), and phosphatidylserine (PS) of lipid extracts from WT (dark gray), *tul1Δ* (light blue), *gld1Δ* (soft purple), and *ORM2<sup>KR</sup>* (pale yellow) mutant cells normalized to the total lipid content. **c** Abundance of ceramides (Cer), inositolphosphoryl-ceramides (IPC), mannosyl-inositolphosphoryl-ceramides (MIPC), mannosyl-diinositolphosphorylceramides (M(IP)2C) classes of lipid extracts from WT (dark gray), *tul1Δ* (light blue), *gld1Δ* (soft purple), and *ORM2<sup>KR</sup>* (pale yellow) mutant cells normalized to the total lipid content. **d-f** Abundance of different **d** ceramide, **e** IPC, and **f** MIPC species of lipid extracts from WT (dark gray), *tul1Δ* (light blue), *gld1Δ* (soft purple), and *ORM2<sup>KR</sup>* (pale yellow) mutant cells shown as mol% normalized to the respective lipid class. Lipid extracts were measured using LC-MS. Data is presented as mean  $\pm$  SD from four independent experiments (n=4 independent experiments) and legend for all graphs is shown on the right-hand side of the figure. Downregulated species are labeled in red. Data were analyzed by multiple unpaired t-test with the two-stage linear step-up procedure of Benjamini, Krieger and Yekutieli. P-values  $> 0.05$  (ns),  $\leq 0.05$  (\*),  $\leq 0.01$  (\*\*) and  $\leq 0.001$  (\*\*\*). The exact p-values are provided in the source data.

# Supplementary Figure 3

**a**

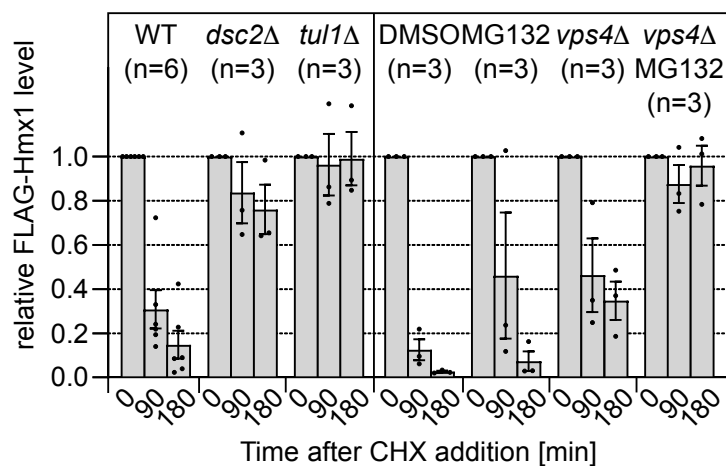

**b**

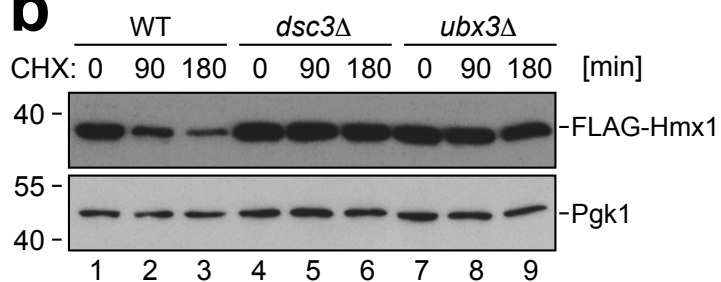

**c**

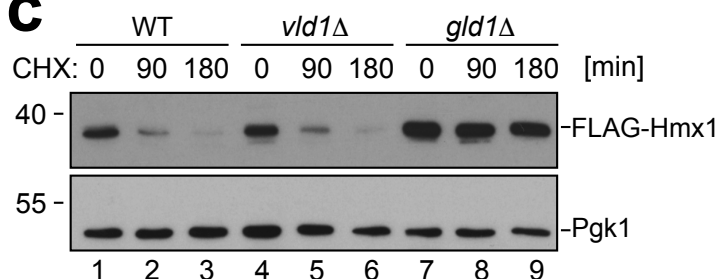

**d**

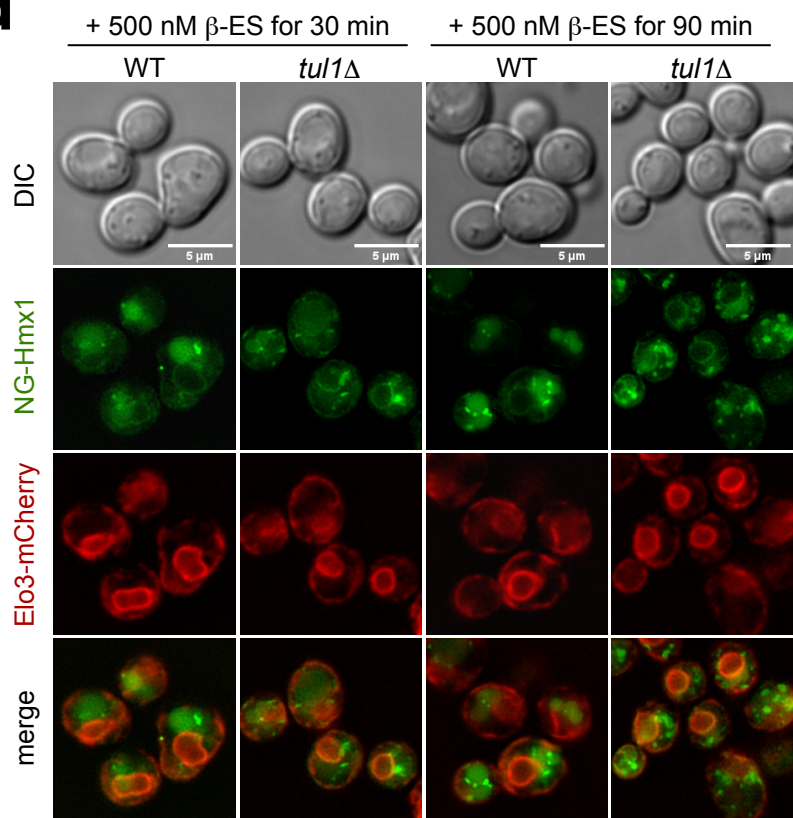

**e**

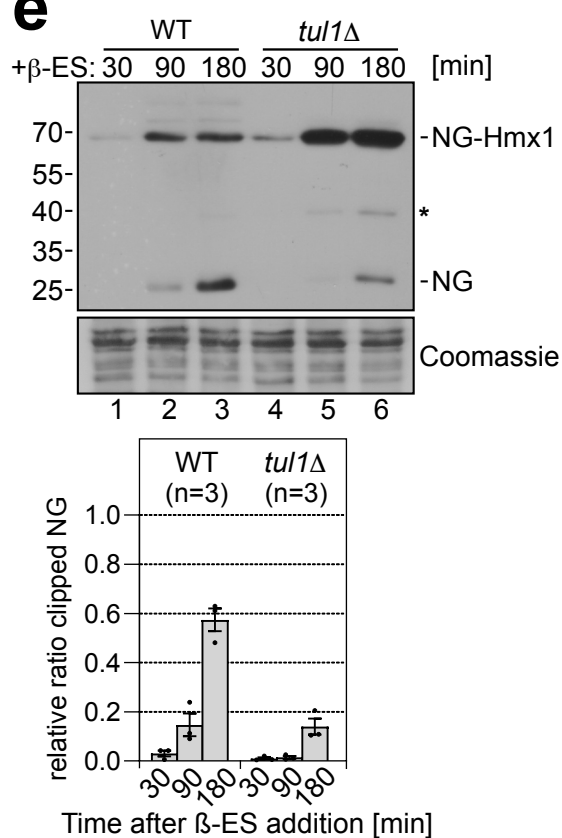

**f**

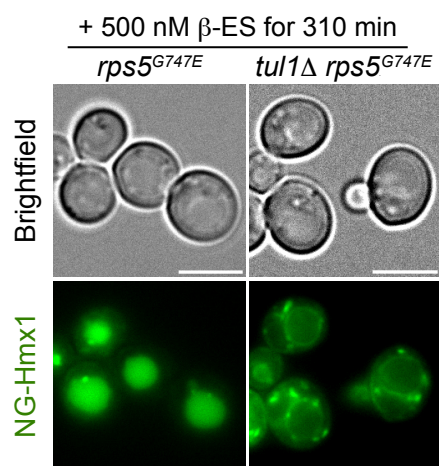

### Supplementary Figure 3. **Hmx1 is a substrate of the Gld1-Dsc complex**

**a** Densitometric quantification of FLAG-Hmx1 protein levels from Western blots of cell lysates of the indicated cells after the addition of CHX (WT: n=6 independent experiments, all others: n=3 independent experiments), presented as mean  $\pm$  standard error of the mean (SEM). **b, c** SDS-PAGE and Western blot analysis with the indicated antibodies of WT cells and the indicated mutants that were either untreated (0 min) or treated with 50  $\mu$ g/mL cycloheximide (CHX) to block protein synthesis for the indicated time points. Coomassie and Pgk1 served as a loading control. **d** Live cell epifluorescence microscopy of the indicated cells, induced (500 nM  $\beta$ -estradiol for the indicated times) mNeogreen-ALFA-Hmx1 (NG-Hmx1) (green) and Elo3-mCherry (red). Scale bars 5 $\mu$ m. **e** NG-Hmx1 expression was induced with 500 nM  $\beta$ -ES and samples were collected at the indicated time points. Densitometric quantification of NG-Hmx1 and free NG protein levels. Each experiment was repeated three times (n=3 independent experiments), the sum of NG-Hmx1 and free NG levels were set to 1, and their respective fraction was related to the sum. Data are presented as mean  $\pm$  SEM. **f** Epifluorescence microscopy of living *rsp5<sup>G747E</sup>* and *tull1 $\Delta$  rsp5<sup>G747E</sup>* mutant cells expressing inducible NG-Hmx1 (green). NG-Hmx1 expression was induced with 500 nM  $\beta$ -ES and imaged after 310 min. Scale bars 5  $\mu$ m. Representative micrographs from 3 independent experiments with similar results are shown in **d, f**.

# Supplementary Figure 4

**a**

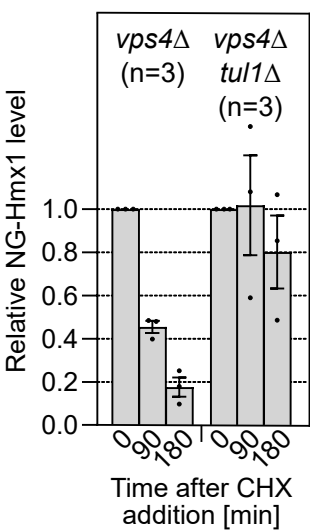

**b**

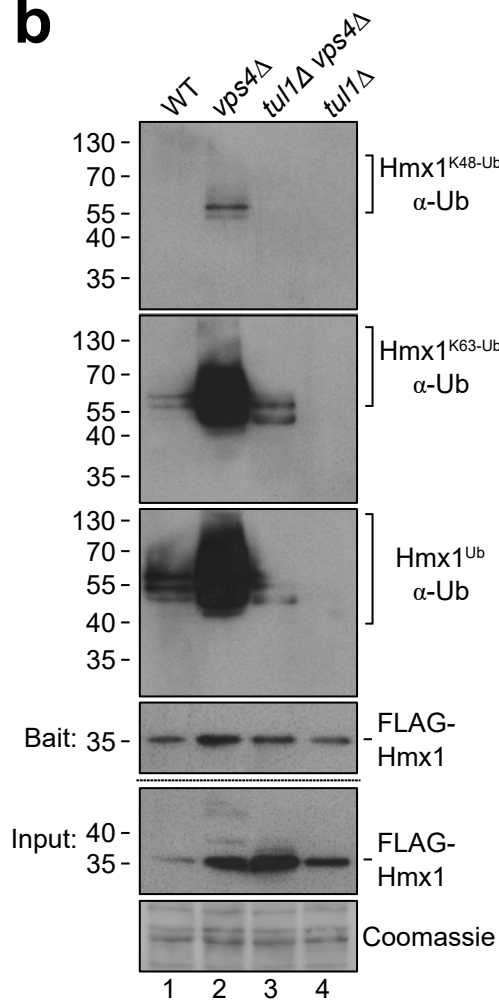

**c**

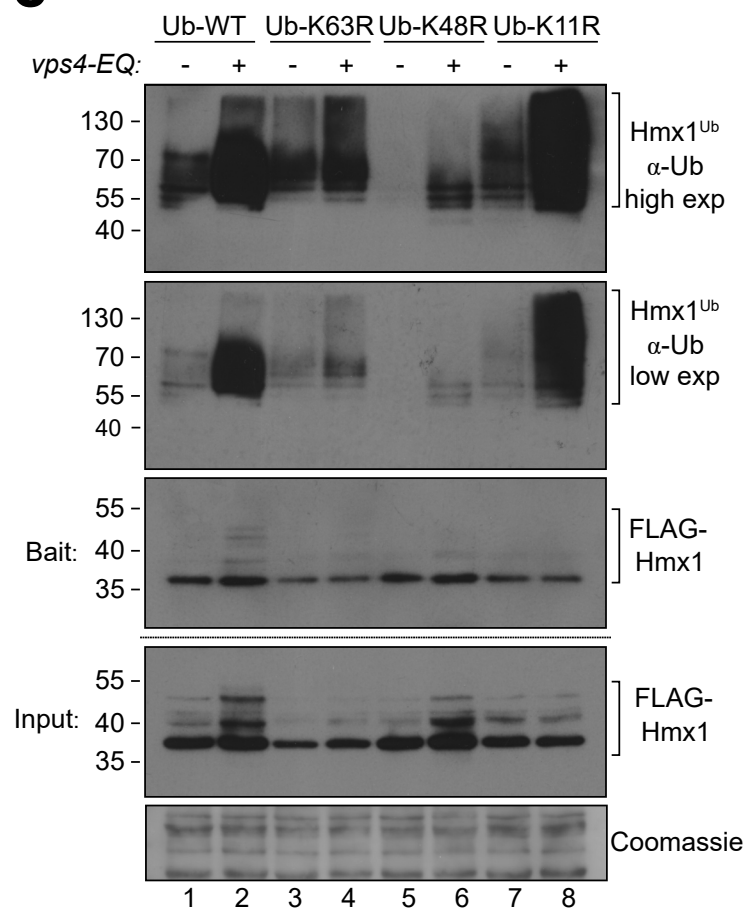

**d**

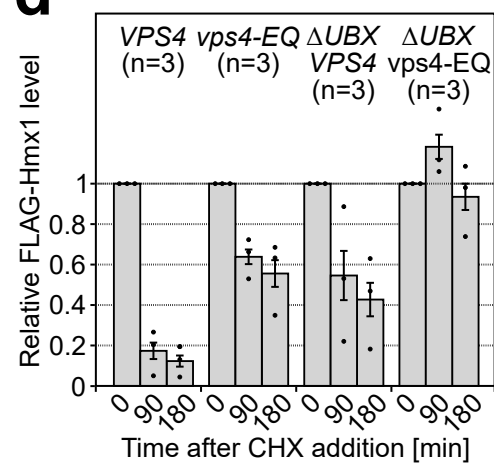

**e**

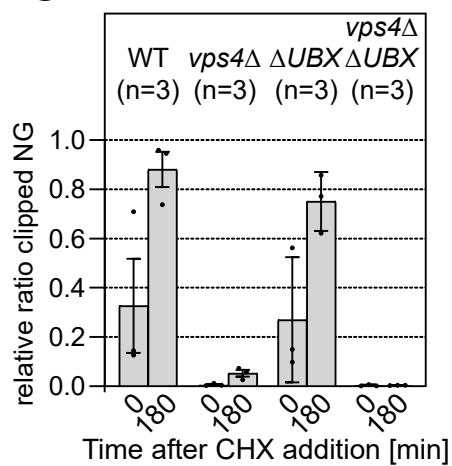

**f**

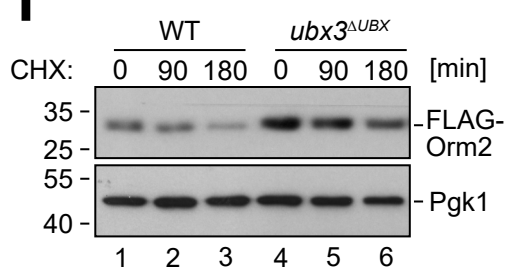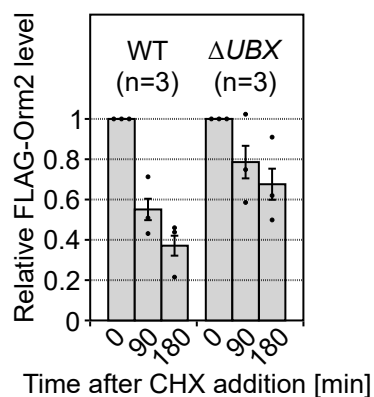

**g**

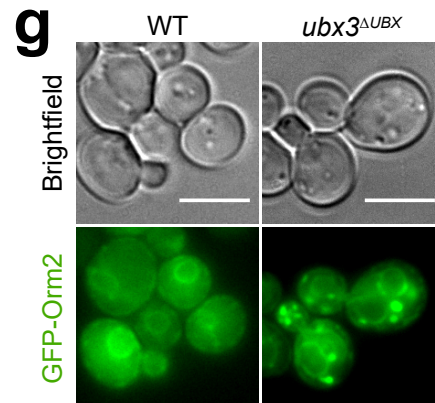



#### Supplementary Figure 4. **Dsc complex substrate ubiquitination and extraction**

**a, d, e** Densitometric quantification of **a, d** FLAG-Hmx1 or **e** NG-Hmx1 clipping (relative ratio of NG-Hmx1 / clipped NG) protein levels from Western blots of cell lysates. Data are presented as mean  $\pm$  SEM. **a, d** Each experiment was repeated three times (n=3 independent experiments), protein levels were normalized to Pgk1 loading controls, and each time point was related to t=0 min (set to 1). **e** Each experiment was repeated three times, the sum of NG-Hmx1 and free NG levels were set to 1, and their respective fraction was related to the sum. **b** SDS-PAGE and Western blot analysis with the indicated antibodies of denaturing FLAG-Hmx1 immunoprecipitations (IP) from the indicated cells. Two top panels: eluates from a 2<sup>nd</sup> IP step with either K48 (top panel) or K63-linkage specific nanobodies. Third panel: 1<sup>st</sup> IP step with  $\alpha$ -Flag antibody. **c** SDS-PAGE and Western blot analysis with the indicated antibodies of denaturing FLAG-Hmx1 immunoprecipitations (IP) from the indicated cells that cannot form K63, K48 or K11 polyubiquitin chains. **b, c** Representative blots from 3 independent experiments with similar results are shown. **f** SDS-PAGE and Western blot analysis with the indicated antibodies of WT cells and the indicated mutants that were either untreated (0 min) or treated with 50  $\mu$ g/mL cycloheximide (CHX) to block protein synthesis for the indicated time points. FLAG-Orm2 was co-expressed from a plasmid. Densitometric quantification of FLAG-Orm2 protein levels from Western blots of cell lysates. Each experiment was repeated three times (n=3 independent experiments), protein levels were normalized to Pgk1 loading controls, and each time point was related to t=0 min (set to 1). Data are presented as mean  $\pm$  (SEM). **g** Epifluorescence microscopy of living WT and *ubx3* <sup>$\Delta$ UBX</sup> cells co-expressing GFP-Orm2 (green) from a plasmid. Scale bars 5  $\mu$ m.

# Supplementary Figure 5

**a**

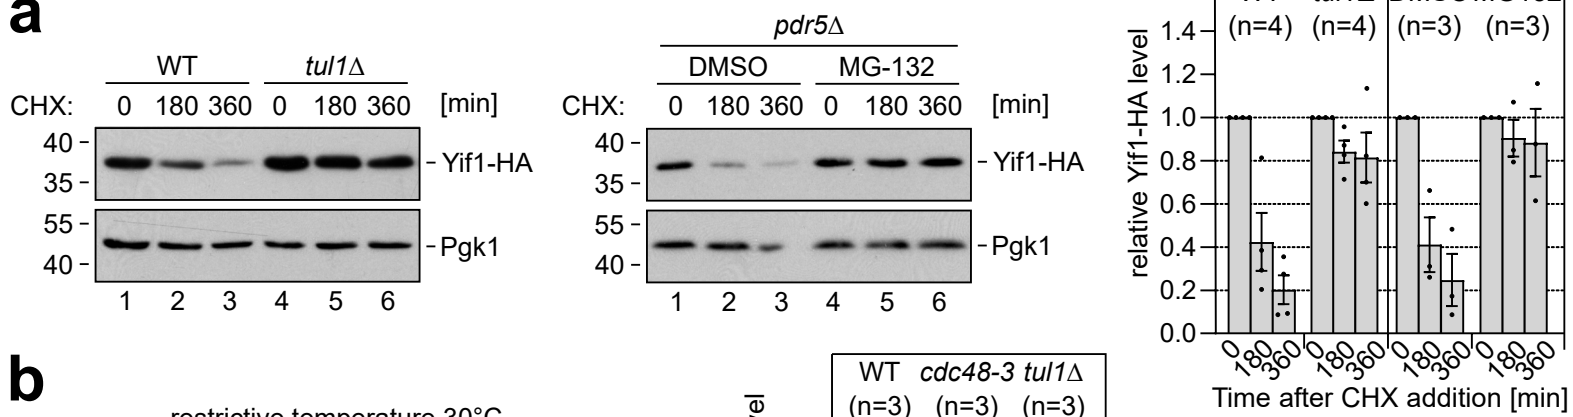

**b**

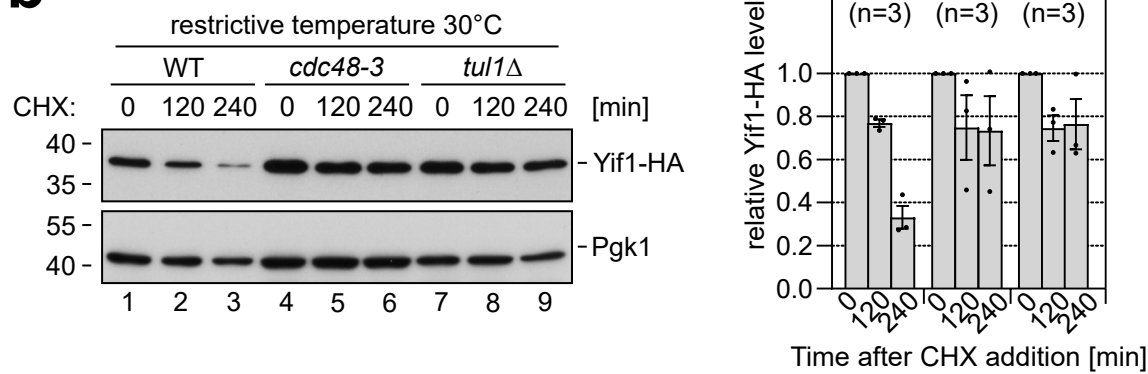

**c**

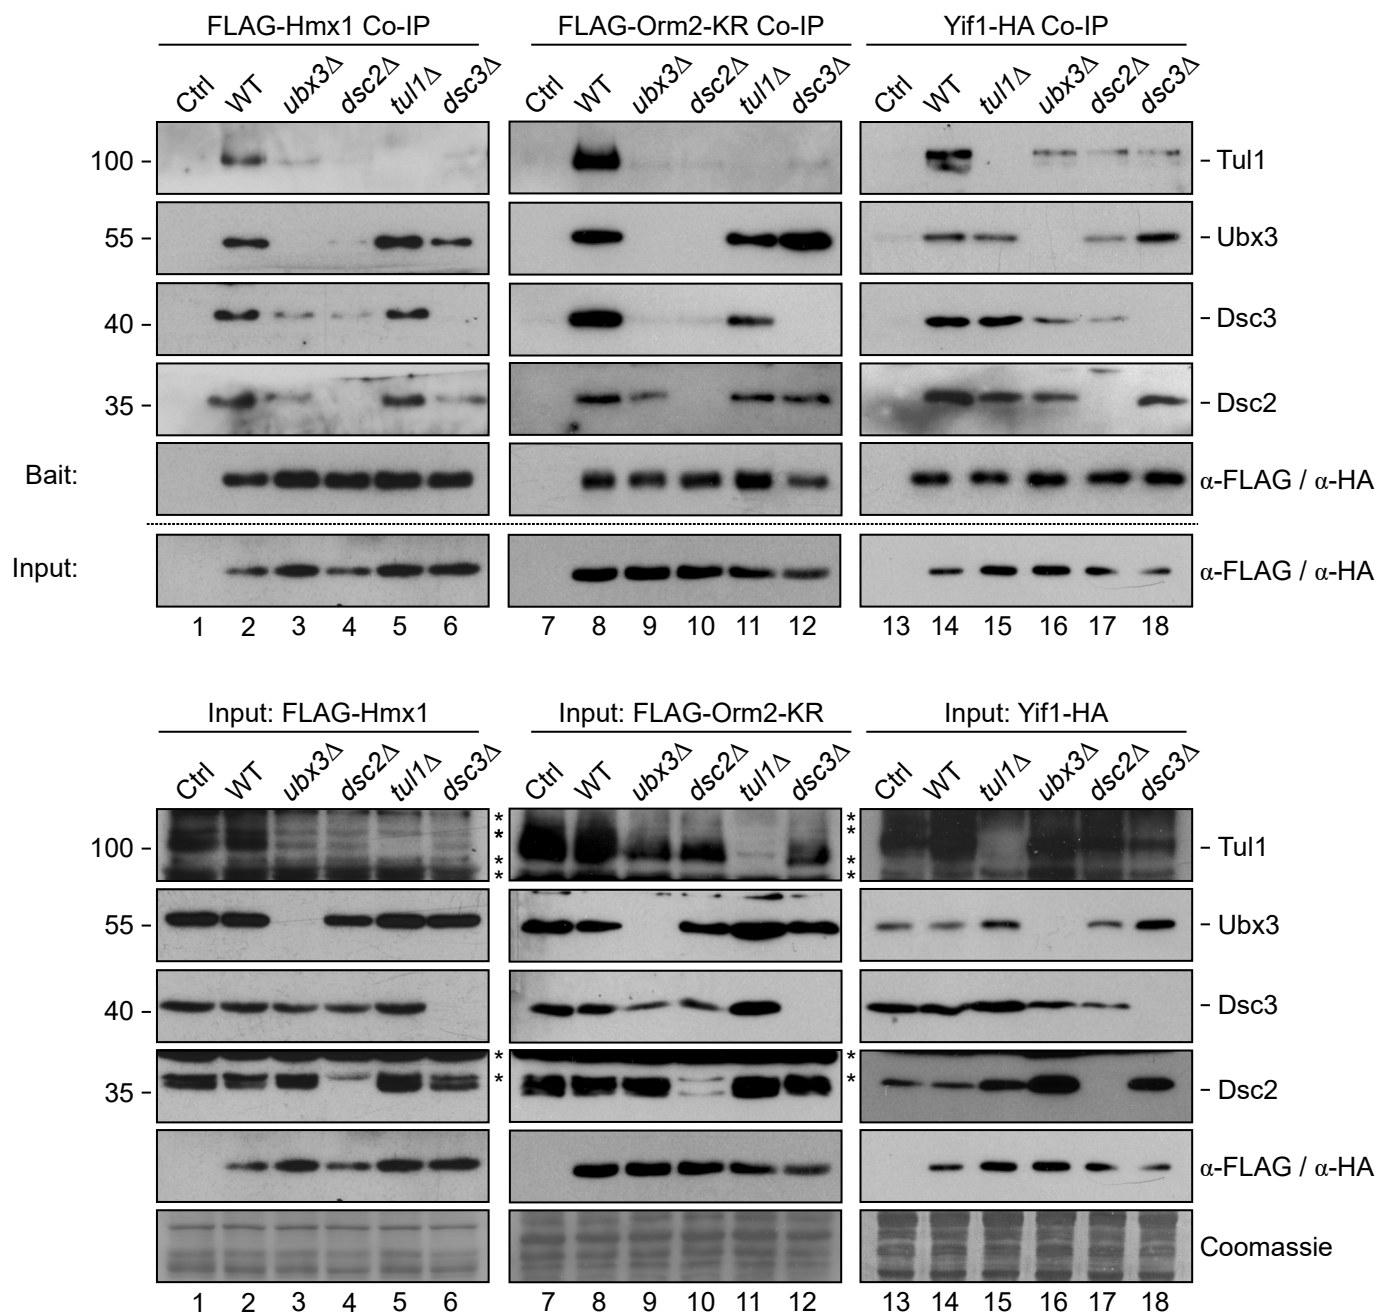

**Supplementary Figure 5. Endogenous Yif1 is a Dsc complex substrate and Dsc2 is required for substrate recognition**

**a-b** SDS-PAGE and Western blot analysis with the indicated antibodies. Cells were left untreated (0 min) or treated with 50  $\mu$ g/mL cycloheximide (CHX) for the indicated time points. Densitometric quantification of Yif1-HA protein levels from Western blots of the indicated cell lysates. Each experiment was repeated at least three times (WT, *tul1* $\Delta$ : n=4 independent experiments; all others: n=3 independent experiments) protein levels were normalized to Pgk1 loading controls, and each time point was related to t=0 min (set to 1). Data are presented as mean  $\pm$  SEM. **a** Middle panel: *pdr5* $\Delta$  cells were incubated with 50  $\mu$ M MG-132 or vehicle (DMSO) 10 min prior to the addition of CHX. **b** Cells were shifted to semi-permissive temperature (30°C). **c** SDS-PAGE and Western blot analysis with the indicated antibodies. Elution (upper panel) and input (lower panel) from non-denaturing FLAG-Hmx1, FLAG-Orm2-KR, and Yif1-HA immunoprecipitations from the indicated cells. Control (Ctrl) cells were untagged WT strains. Representative blots from 3 independent experiments with similar results are shown.

Supplementary Figure 6. **MD simulation of Dsc2 and lipid interactions**

**a** Overlay of the lipid density map with a top view (from the luminal site) of the rhomboid domain of Dsc2 or Dsc2<sup>Y52AR,53A</sup> displaying the distance of the average center of mass in the lipid bilayer over the final 40 ns and the lipids. **b** Snapshots of the molecular dynamics simulation of the rhomboid domain of Dsc2 showing the entire system including a single asymmetric PC (10:0; 16:0), all other lipids and water or just the Dsc2 rhomboid domain with water in orthographic and perspective views. The C10 acyl chain is shown in yellow. For clarity, also another snapshot with the different angle is provided. **c** Lipid dissociation plots show the distance in (Å) of the first 5 C atoms in the C10 chain with respect to L21 of Dsc2 over a period of 40 ns. PC (10:0; 16:0) (red), PC (18:1; 16:0) (black) or PC (10:1; 16:0) (blue). **d** Alignment of the L1 loop region of Dsc2 with other indicated (pseudo)rhomboids. **e, f** Densitometric quantification from Western blots of the indicated cell lysates. Each experiment was repeated three times (n=3 independent experiments), protein levels were normalized to Pgk1 loading controls, and each time point was related to t=0 min (set to 1). Data are presented as mean ± SEM.

# Supplementary Figure 6

**a**

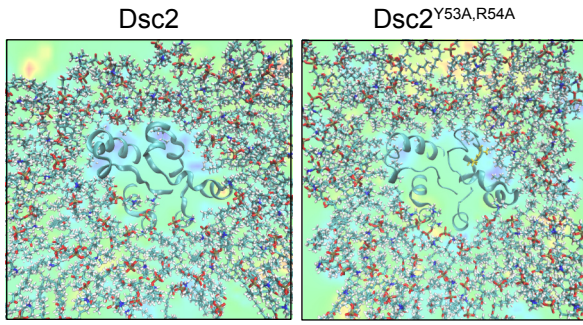

**b**

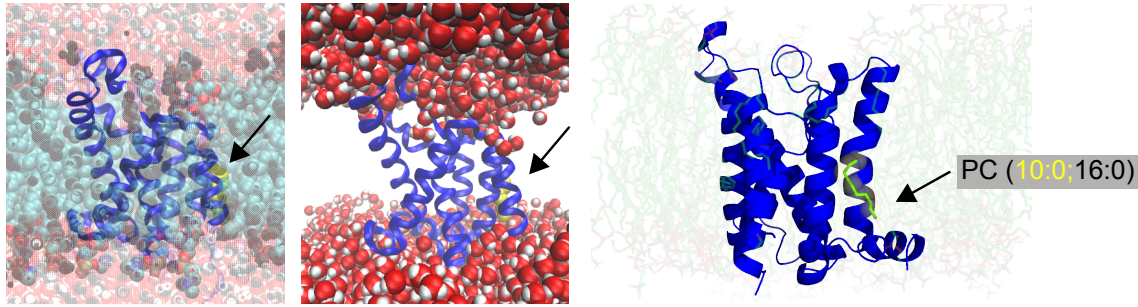

**c**

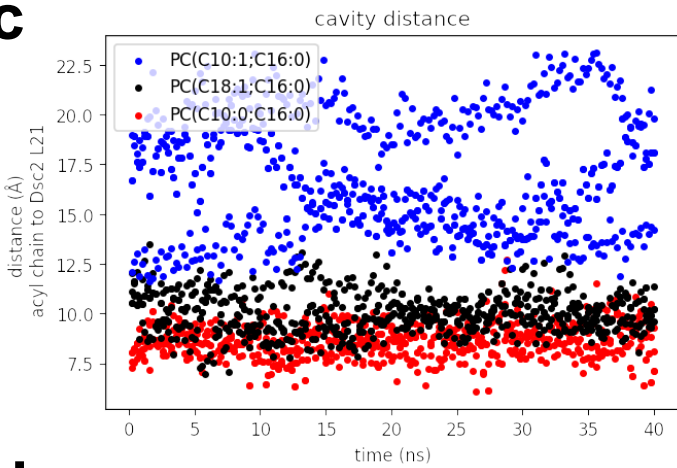

**d**

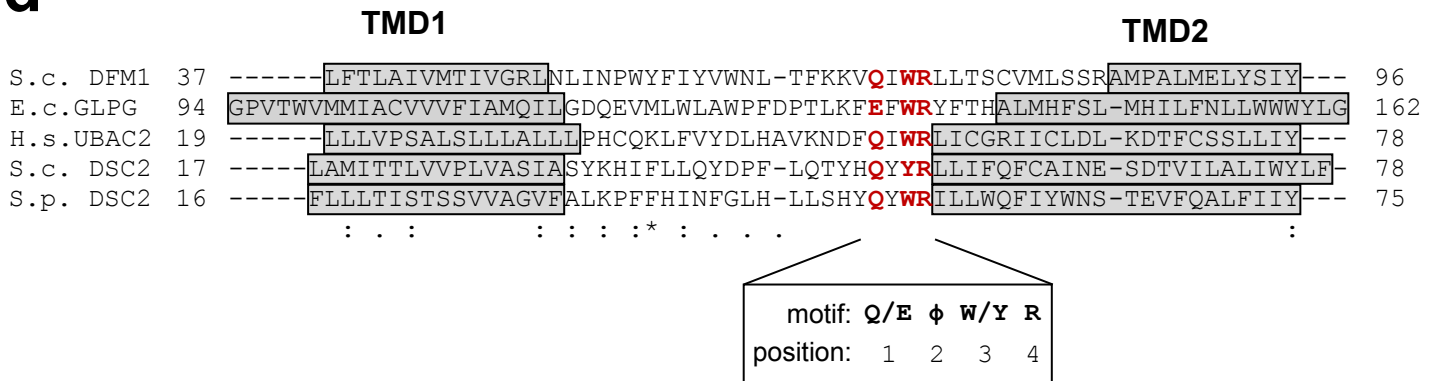

**e**

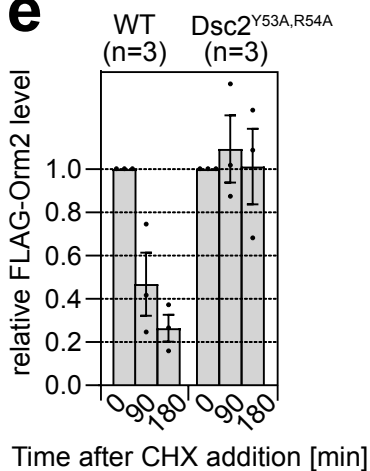

**f**

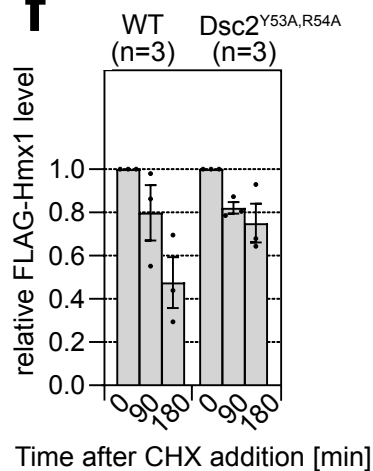

# Supplementary Figure 7

**a**

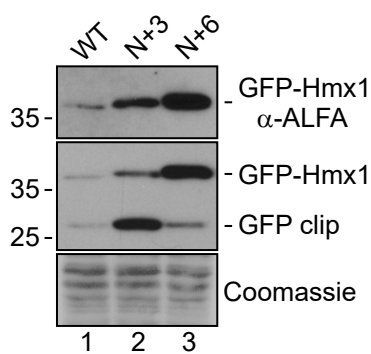

**b**

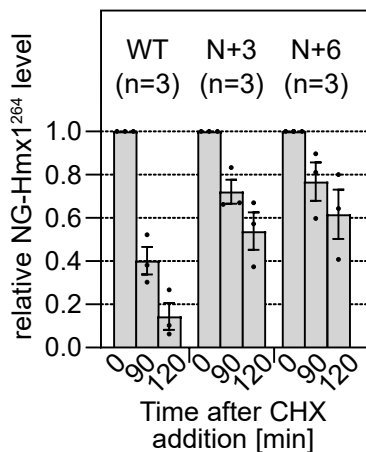

**c**

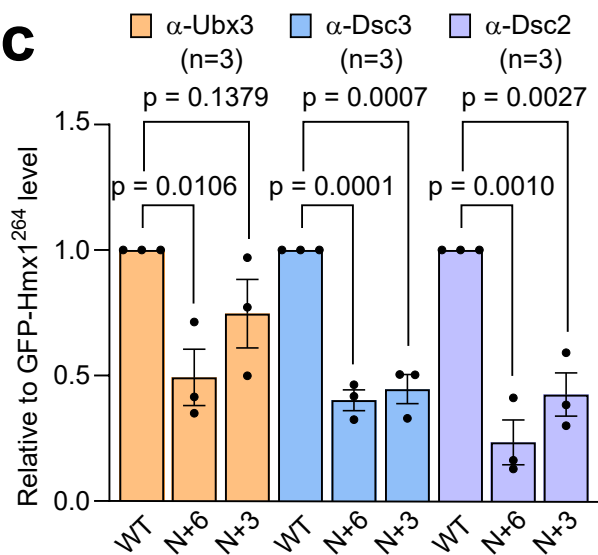

**d**

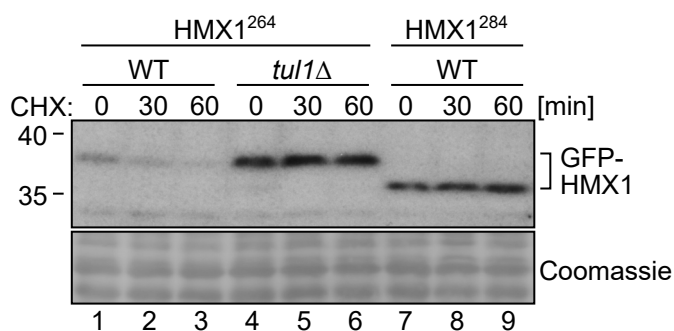

**e**

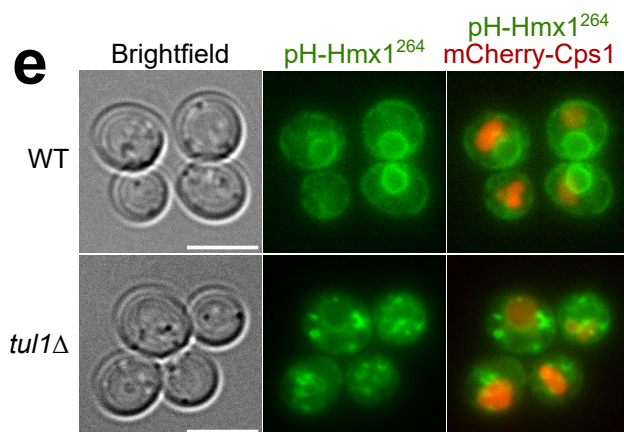

**f**

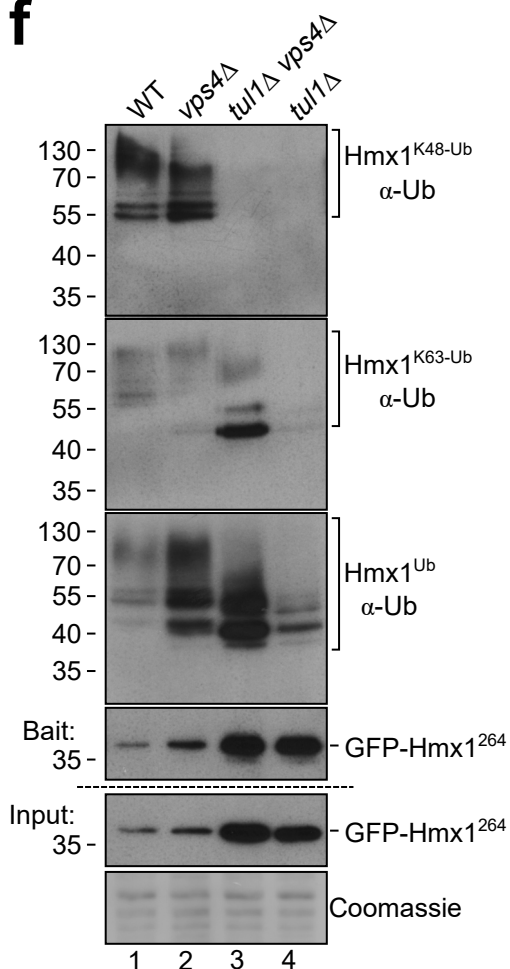

**g**

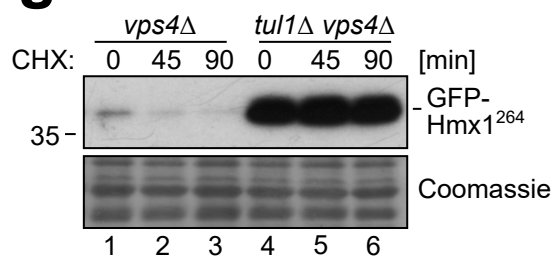

**h**

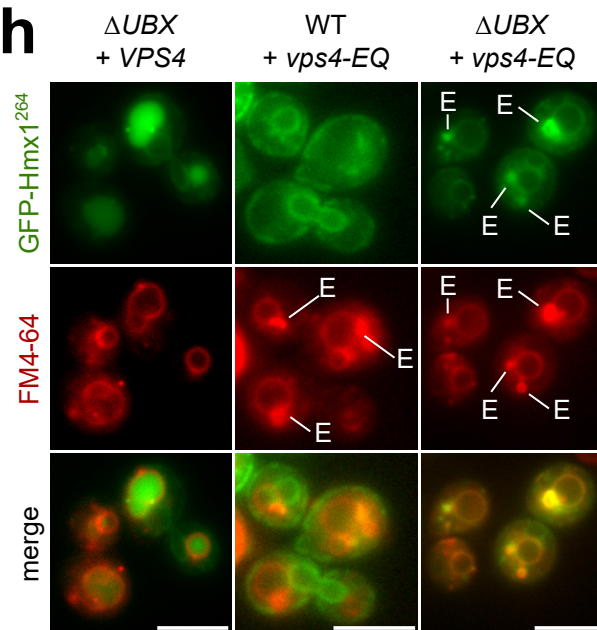

**i**

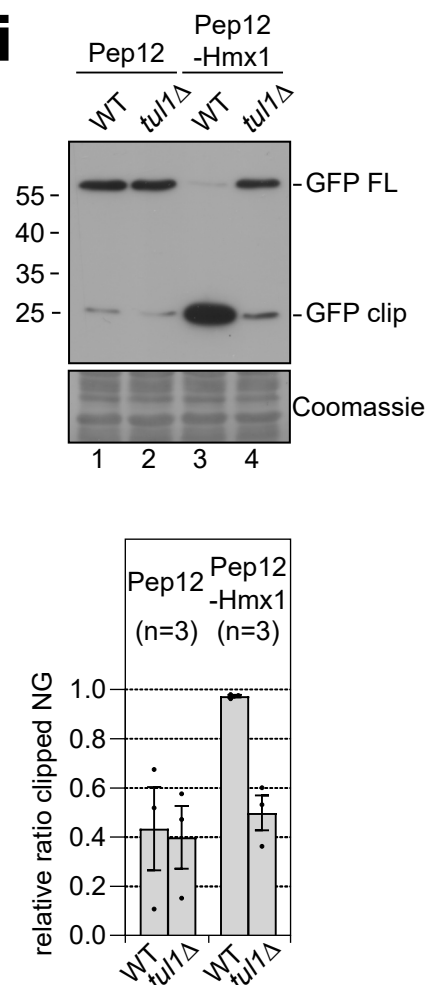

Supplementary Figure 7. **The TMD of Hmx1 is a Dsc complex degra**

**a** SDS-PAGE and Western blot analysis with the indicated antibodies of whole cell lysates from WT cells expressing the indicated versions of the Hmx1 TMD. Representative blots from 3 independent experiments with similar results are shown. **b, c** Densitometric quantification of protein levels from Western blots of **Figure 7b** cell lysates **Figure 7c** immunoprecipitated proteins. Each experiment was repeated three times (n=3 independent experiments), protein levels were normalized to Pgk1 loading controls. Data are presented as mean  $\pm$  SEM. Data were analyzed by a two-tailed unpaired t-test. **d, g, i** SDS-PAGE and Western blot analysis with the indicated antibodies of total cell lysates from the indicated cells expressing different model substrates: **d, g** expressing truncated eGFP-ALFA-Hmx1<sup>264</sup> or eGFP-ALFA-Hmx1<sup>284</sup> **i** or eGFP-Pep12 or eGFP-Pep12-Hmx1, including densitometric quantification (n=3 independent experiments). **d, g** Cells were left untreated (0 min) or treated with 50  $\mu$ g/mL cycloheximide (CHX) to block protein synthesis for 45 min to 90 min. Coomassie served as a loading control. **e** Epifluorescence and phase contrast microscopy of living WT and *tul1 $\Delta$*  mutants expressing truncated pHluorine-Hmx1 (pH-Hmx1<sup>264</sup>) from residue 264-317 (green) with mCherry-Cps1 (red, MVB cargo). Scale bars 5  $\mu$ m. **f** SDS-PAGE and Western blot analysis with the indicated antibodies of input and elution of denaturing eGFP-ALFA-Hmx1<sup>264</sup> immunoprecipitations (IP) from WT cells and the indicated mutants. Coomassie served as a loading control. The two top panels show the eluates from a 2<sup>nd</sup> IP step with K48- or K63-linkage specific nanobodies decorated with an anti-ubiquitin antibody. Representative blots from 3 independent experiments with similar results are shown in **d, f, g**. **h** Epifluorescence and phase contrast microscopy of living WT and *ubx3 $\Delta$ UBX* ( $\Delta$ UBX) mutants expressing truncated GFP-Hmx1 from residue 264-317. Cells additionally expressed either *VPS4* or *vps4-E233Q* (to block vacuolar sorting) from an episomal plasmid. Panel shows GFP-Hmx1<sup>264</sup> (green) with FM4-64 (red, vacuolar membrane). E indicates class E compartments; scale bars 5  $\mu$ m.

## Supplementary Tables

### Supplementary Table 1.

#### Gene ontology - cellular component for upregulated membrane proteins

| WT/ <i>tul1</i> Δ Hits: 21 |             |             |             |                |              | WT/ <i>vps4</i> Δ Hits: 72 |             |              |                |             |
|----------------------------|-------------|-------------|-------------|----------------|--------------|----------------------------|-------------|--------------|----------------|-------------|
| Cellular Component         | ER          | Golgi       | PM          | vacuole        | mitos        | ER                         | Golgi       | PM           | vacuole        | mitos       |
| Count                      | 6           | 3           | 2           | 4              | 5            | 12                         | 5           | 34           | 15             | 1           |
| Frequency                  | 29%         | 14%         | 10%         | 19%            | 24%          | 17%                        | 7%          | 47%          | 21%            | 1%          |
| <i>Genes</i>               | <i>ALG3</i> | <i>GNT1</i> | <i>FTR1</i> | <i>CPR8</i>    | <i>COX1</i>  | <i>CSG2</i>                | <i>AKR1</i> | <i>AGP1</i>  | <i>CCC2</i>    | <i>FIS1</i> |
|                            | <i>CSG2</i> | <i>NEO1</i> | <i>VHT1</i> | <i>CTS1</i>    | <i>COX10</i> | <i>SUR1</i>                | <i>KHA1</i> | <i>AQR1</i>  | <i>COS8</i>    |             |
|                            | <i>DGK1</i> | <i>TPO5</i> |             | <i>VPS33</i>   | <i>ECM19</i> | <i>EMC1</i>                | <i>SMF2</i> | <i>BAP2</i>  | <i>COT1</i>    |             |
|                            | <i>ELO2</i> |             |             | <i>YML018C</i> | <i>RCF1</i>  | <i>ERG3</i>                | <i>TLG1</i> | <i>CAN1</i>  | <i>CPR8</i>    |             |
|                            | <i>HMX1</i> |             |             |                | <i>TIM17</i> | <i>FLC2</i>                | <i>VTI1</i> | <i>CCH1</i>  | <i>FET5</i>    |             |
|                            | <i>ORM2</i> |             |             |                |              | <i>HMX1</i>                |             | <i>DIP5</i>  | <i>PMC1</i>    |             |
|                            |             |             |             |                |              | <i>INP54</i>               |             | <i>ENA1</i>  | <i>PRB1</i>    |             |
|                            |             |             |             |                |              | <i>NSG2</i>                |             | <i>ENA2</i>  | <i>PRM4</i>    |             |
|                            |             |             |             |                |              | <i>PMT5</i>                |             | <i>ENA5</i>  | <i>SMF3</i>    |             |
|                            |             |             |             |                |              | <i>PRM8</i>                |             | <i>FCY2</i>  | <i>SNA3</i>    |             |
|                            |             |             |             |                |              | <i>YDR476C</i>             |             | <i>FET3</i>  | <i>VPS62</i>   |             |
|                            |             |             |             |                |              | <i>YET3</i>                |             | <i>FRE1</i>  | <i>YML018C</i> |             |
|                            |             |             |             |                |              |                            |             | <i>FTR1</i>  | <i>YOL019W</i> |             |
|                            |             |             |             |                |              |                            |             | <i>FUI1</i>  | <i>COS6</i>    |             |
|                            |             |             |             |                |              |                            |             | <i>GAP1</i>  | <i>PEP12</i>   |             |
|                            |             |             |             |                |              |                            |             | <i>HIP1</i>  |                |             |
|                            |             |             |             |                |              |                            |             | <i>HXT1</i>  |                |             |
|                            |             |             |             |                |              |                            |             | <i>HXT2</i>  |                |             |
|                            |             |             |             |                |              |                            |             | <i>MMP1</i>  |                |             |
|                            |             |             |             |                |              |                            |             | <i>PHO90</i> |                |             |
|                            |             |             |             |                |              |                            |             | <i>PTR2</i>  |                |             |
|                            |             |             |             |                |              |                            |             | <i>PUN1</i>  |                |             |
|                            |             |             |             |                |              |                            |             | <i>STE2</i>  |                |             |
|                            |             |             |             |                |              |                            |             | <i>STE6</i>  |                |             |
|                            |             |             |             |                |              |                            |             | <i>SUL2</i>  |                |             |
|                            |             |             |             |                |              |                            |             | <i>TPN1</i>  |                |             |
|                            |             |             |             |                |              |                            |             | <i>SUL1</i>  |                |             |
|                            |             |             |             |                |              |                            |             | <i>YRO2</i>  |                |             |
|                            |             |             |             |                |              |                            |             | <i>TNA1</i>  |                |             |
|                            |             |             |             |                |              |                            |             | <i>GNP1</i>  |                |             |
|                            |             |             |             |                |              |                            |             | <i>LYP1</i>  |                |             |
|                            |             |             |             |                |              |                            |             | <i>BAP3</i>  |                |             |
|                            |             |             |             |                |              |                            |             | <i>SIT1</i>  |                |             |
|                            |             |             |             |                |              |                            |             | <i>RSN1</i>  |                |             |



Supplementary Table 2.

**Reagents, strains and plasmid**

| <b>Antibodies (dilution)</b>                                                       | <b>SOURCE</b>              | <b>IDENTIFIER</b>                        |
|------------------------------------------------------------------------------------|----------------------------|------------------------------------------|
| Goat anti mouse IgG-HRP (1:5,000)                                                  | Sigma                      | Cat. # A4416;<br>RRID:AB_258167          |
| Goat anti rabbit IgG-HRP (1:5,000)                                                 | Sigma                      | Cat. # A0545;<br>RRID:AB_257896          |
| Rat anti-mouse IgG-HRP for IP (1:10,000)                                           | Abcam                      | Cat. # ab131368<br>RRID:AB_289511<br>4   |
| Mouse monoclonal anti-PGK1 (22C5D8) (1:10,000)                                     | Invitrogen                 | Cat. # 459250;<br>RRID:AB_253223<br>5    |
| Mouse monoclonal anti-GFP (IgG1K, clones 7.1 and 13.1) (1:1,000)                   | Roche Diagnostics          | Cat. #<br>11814460001;<br>RRID:AB_390913 |
| Rabbit polyclonal anti-GFP (1:1,000)                                               | ChromoTek                  | Cat # PABG1-100;<br>RRID:AB_256500<br>6  |
| Mouse monoclonal anti-FLAG M2 (1:5,000)                                            | Sigma                      | Cat. # F3165;<br>RRID:AB_259529          |
| Mouse monoclonal anti-HA (IgG1K, clone 16B12) (1:2,000)                            | Bio Legend                 | Cat. # 901502;<br>RRID:AB_256500<br>6    |
| Rabbit monoclonal anti-HA (IgG, clone C29F4) (1:2,000)                             | Cell Signaling             | Cat. # 3724,<br>RRID:AB_154958<br>5      |
| Mouse monoclonal anti-ubiquitin (P4D1) (1:1,000)                                   | Santa Cruz                 | Cat. # sc-8017;<br>RRID:AB_628423        |
| Rabbit monoclonal anti-K48-linkage specific poly-ubiquitin (clone, D9D5) (1:1,000) | Cell signaling             | Cat. #8081;<br>RRID:AB_108598<br>93      |
| Rabbit polyclonal anti-Tul1 (1:2,000)                                              | Gift from Peter Espenshade | 1                                        |
| Rabbit polyclonal anti-Ubx3 (1:2,000)                                              | Gift from Peter Espenshade | 1                                        |
| Rabbit polyclonal anti-Dsc2 (1:100)                                                | Gift from Peter Espenshade | 1                                        |
| Rabbit polyclonal anti-Dsc3 (1:2,000)                                              | Gift from Peter Espenshade | 1                                        |
| Rabbit monoclonal anti-mNeonGreen (IgG, clone E6M3D) (1:1,000)                     | Cell Signaling             | Cat. #41236                              |
| Rabbit polyclonal anti-ALFA (1:2,000)                                              | NanoTag Biotechnologies    | Cat. #N1581                              |
| <b>Chemicals, Peptides, and Recombinant Proteins</b>                               | <b>SOURCE</b>              | <b>IDENTIFIER</b>                        |
| [13C6,15N2]-L-lysine                                                               | Sigma                      | Cat. # 608041                            |

|                                                     |                             |                                      |
|-----------------------------------------------------|-----------------------------|--------------------------------------|
| anti-FLAG magnetic beads M2                         | Sigma                       | Cat. # M8823;<br>RRID:AB_263708<br>9 |
| 3xFLAG elution peptide                              | Sigma                       | Cat. # F4799                         |
| MG-132                                              | Sigma                       | Cat. # 474787                        |
| Cycloheximide                                       | Sigma                       | Cat. # C7698                         |
| anti-ALFA selector ST magnetic beads                | NanoTag<br>Biotechnologies  | Cat. # N1516                         |
| anti-ALFA selector CE agarose beads                 | NanoTag<br>Biotechnologies  | Cat. # N1512-L                       |
| ALFA elution peptide                                | NanoTag<br>Biotechnologies  | Cat. # N1520                         |
| anti-Ubiquitin K48 Selector agarose beads           | NanoTag<br>Biotechnologies  | Cat. # N1810                         |
| anti-Ubiquitin K63 Selector agarose beads           | NanoTag<br>Biotechnologies  | Cat. # N1910                         |
| Pierce™ anti-HA magnetic beads                      | Thermo Fisher<br>Scientific | Cat. # 88836                         |
| MagStrep“type3“ XT Beads                            | IBA                         | Cat. #2-4090-002                     |
| cOmplete™, EDTA-free Protease Inhibitor<br>Cocktail | Sigma                       | Cat. # C7698                         |
| N-ethylmaleimide (NEM)                              | Sigma                       | Cat. # E3876                         |
| phenylmethane sulfonyl fluoride (PMSF)              | Sigma                       | Cat. # P7626                         |
| protease inhibitor cocktail                         | Sigma                       | Cat. # P8215                         |
| glyco-diosgenin (GDN)                               | Sigma                       | Cat. # 850525                        |
| β-Estradiol                                         | Sigma                       | Cat. # E2758                         |
| FM4-64 Dye                                          | Thermo Fisher<br>Scientific | Cat. # T3166                         |

| <b>Yeast strains:</b>                                                                                      | <b>SOURCE</b>            | <b>IDENTIFIER</b> |
|------------------------------------------------------------------------------------------------------------|--------------------------|-------------------|
| SEY6210 wildtype ( <i>MAT<math>\alpha</math> leu2-3, 112 ura3-52 his3-200 trp1-901 lys2-801 suc2-9</i> )   | 2                        | SEY6210           |
| SEY6210.1 wildtype ( <i>MAT<math>\alpha</math> leu2-3, 112 ura3-52 his3-200 trp1-901 lys2-801 suc2-9</i> ) | 2                        | SEY6210.1         |
| SEY6210.1 <i>vps4::TRP1</i>                                                                                | 3                        | MBY4              |
| SEY6210.1 <i>tul1::HIS3</i>                                                                                | 4                        | SSY17             |
| SEY6210.1 <i>vps4::TRP1, tul1::HIS3</i>                                                                    | 4                        | SSY31             |
| SEY6210.1 <i>orm2::TRP1</i>                                                                                | 4                        | YWY005            |
| SEY6210.1 <i>vps4::TRP1, pdr5::HIS3</i>                                                                    | this study               | YWY007            |
| SEY6210.1 <i>orm2::TRP1, tul1::HIS3</i>                                                                    | 4                        | YWY027            |
| SEY6210 <i>orm2::TRP1, ubx3::HIS3</i>                                                                      | 4                        | YWY047            |
| SEY6210.1 <i>ubx3ΔUBX::HIS3</i>                                                                            | this study               | YWY050            |
| SEY6210.1 <i>gld1::HIS3</i>                                                                                | this study, <sup>4</sup> | YWY051            |
| SEY6210.1 <i>vld1::HIS3</i>                                                                                | this study, <sup>4</sup> | YWY052            |
| SEY6210 <i>orm2::TRP1, dsc3::HIS3</i>                                                                      | 4                        | YWY055            |
| SEY6210.1 <i>orm2::TRP1, dsc2::HIS3</i>                                                                    | 4                        | YWY056            |
| SEY6210 <i>YIF1-3xHA::TRP1</i>                                                                             | this study               | YWY089            |
| SEY6210 <i>YIF1-3xHA::TRP1, tul1::HIS3</i>                                                                 | this study               | YWY090            |
| SEY6210 <i>UBX3-3xFLAG::HIS3</i>                                                                           | this study               | YWY118            |
| SEY6210? <i>YIF1-3xHA::TRP1, pdr5::HIS3</i>                                                                | this study               | YWY122            |

|                                                                                   |                               |        |
|-----------------------------------------------------------------------------------|-------------------------------|--------|
| SEY6210 <i>ubx3ΔUBX::TRP1</i>                                                     | this study                    | YWY146 |
| SEY6210.1 <i>YIF1-3xHA::TRP1, ubx3::HIS3</i>                                      | this study                    | YWY167 |
| SEY6210 <i>YIF1-3xHA::TRP1, dsc2::HIS3</i>                                        | this study                    | YWY168 |
| SEY6210.1 <i>YIF1-3xHA::TRP1, dsc3::HIS3</i>                                      | this study                    | YWY169 |
| SEY6210.1 <i>UBX3-3xFLAG::HIS3, dsc3::HIS3</i>                                    | this study                    | YWY204 |
| SEY6210.1 <i>YIF1-3xHA::TRP1 cdc48-3</i>                                          | this study, <sup>5</sup>      | YWY268 |
| SEY6210.1 <i>UBX3-3xFLAG::HIS3, dsc2::HIS3, YIF1-3xHA::TRP1</i>                   | this study                    | YWY320 |
| SEY6210.1 <i>hmx1::HIS3</i>                                                       | this study                    | YWY322 |
| SEY6210.1 <i>hmx1::3xFLAG-HMX1-TRP1</i>                                           | this study                    | YWY329 |
| SEY6210.1 <i>hmx1::3xFLAG-HMX1-TRP1, tull::HIS3</i>                               | this study                    | YWY337 |
| SEY6210 <i>yif1::HIS3, P<sup>ADHI</sup>-eGFP-YIF1-pRS406</i>                      | this study                    | YWY345 |
| SEY6210 <i>yif1::HIS3, tull::KanMX4, P<sup>ADHI</sup>-eGFP-YIF1-pRS406</i>        | this study                    | YWY352 |
| SEY6210.1 <i>hmx1::3xFLAG-HMX1:TRP1, vps4::TRP1, pdr5::HIS3, cdc48-3</i>          | this study, <sup>5</sup>      | YWY421 |
| SEY6210.1 <i>tull::KanMX4, hmx1::HIS3</i>                                         | this study                    | YWY461 |
| SEY6210.1 <i>ubx3::HIS3, hmx1::HIS3</i>                                           | this study                    | YWY469 |
| SEY6210.1 <i>dsc3::HIS3, hmx1::HIS3</i>                                           | this study                    | YWY471 |
| SEY6210 <i>vps4::TRP1, hmx1::HIS3</i>                                             | this study                    | YWY472 |
| SEY6210 <i>vps4::TRP1, tull::KanMX4, hmx1::HIS3</i>                               | this study                    | YWY474 |
| SEY6210 <i>dsc2::HIS3, hmx1::HIS3</i>                                             | this study                    | YWY475 |
| SEY6210.1 <i>dsc2::HIS3, hmx1::HIS3</i>                                           | this study                    | YWY476 |
| SEY6210.1 <i>hmx1::3xFLAG-HMX1-TRP1, ubx3ΔUBX::HIS3</i>                           | this study                    | YWY478 |
| SEY6210.1 <i>hmx1::HIS3, ubx3ΔUBX::TRP1</i>                                       | this study                    | YWY487 |
| SEY6210.1 <i>hmx1::HIS3, rsp5::HIS + rsp5(G747E)/pRS415</i>                       | this study, gift from Ming Li | YWY495 |
| SEY6210.1 <i>hmx1::HIS3, tull::NatR, rsp5::HIS + rsp5(G747E)/pRS415</i>           | this study, gift from Ming Li | YWY496 |
| SEY6210.1 <i>hmx1::HIS3, ubx3ΔUBX::HIS3</i>                                       | this study                    | ISY198 |
| SEY6210 <i>hmx1::HIS3, ubx3ΔUBX::HIS3, vps4::TRP1</i>                             | this study                    | ISY199 |
| SEY6210 <i>UBX3-3xFLAG::HIS3, YIF1-3xHA::TRP1</i>                                 | this study                    | ISY213 |
| SEY6210.1 <i>UBX3-3xFLAG::HIS3, tull::HIS3, YIF1-3xHA::TRP1</i>                   | this study                    | ISY215 |
| SEY6210.1 <i>UBX3-3xFLAG::HIS3, dsc3::HIS3, YIF1-3xHA::TRP1</i>                   | this study                    | ISY216 |
| SEY6210 <i>YIP(URA3)-SEC7pr-SEC7-6xmCherry</i>                                    | this study; <sup>4</sup>      | ISY223 |
| SEY6210.1 <i>gld1::HIS3, YIP(URA3)-SEC7pr-SEC7-6xmCherry</i>                      | this study                    | ISY222 |
| SEY6210.1 <i>tull::HIS3, YIP(URA3)-SEC7pr-SEC7-6xmCherry</i>                      | this study                    | ISY225 |
| SEY6210 <i>tull::HIS3, ELO3-3xHA-mCherry::TRP1</i>                                | this study, <sup>4</sup>      | ISY227 |
| SEY6210 <i>UBX3-mNeongreen::TRP1, tull::HIS3, YIP(URA3)-SEC7pr-SEC7-6xmCherry</i> | this study                    | ISY233 |

|                                                                                                                                                                              |                                  |         |
|------------------------------------------------------------------------------------------------------------------------------------------------------------------------------|----------------------------------|---------|
| SEY6210.1 <i>UBX3-mNeongreen::TRP1, tul1::HIS3, YIP(TRP1)-MNN9pr-MNN9-mTagBFP2</i>                                                                                           | this study                       | ISY237  |
| SEY6210.1 <i>orm2::KL-URA3</i>                                                                                                                                               | this study                       | OSY583  |
| SEY6210 <i>ELO3-3xHA-mCherry::TRP1</i>                                                                                                                                       | this study, <sup>4</sup>         | OSY847  |
| SEY6210 <i>ubx3ΔUBX::TRP1, vps4::TRP1, pdr5::HIS3</i>                                                                                                                        | this study                       | OSY1243 |
| SEY6210 <i>UBX3-mNeonGreen::TRP1</i>                                                                                                                                         | <sup>6</sup>                     | MWY218  |
| SEY6210.1 <i>UBX3-mNeonGreen::TRP1, tul1::HIS3</i>                                                                                                                           | this study                       | MWY221  |
| SEY6210 <i>UBX3-mNeonGreen::TRP1, dsRed-HDEL::TRP1</i>                                                                                                                       | this study                       | MWY248  |
| SEY6210 <i>UBX3-mNeonGreen::TRP1, dsRed-HDEL::TRP1, tul1::HIS3</i>                                                                                                           | this study                       | MWY250  |
| SEY6210.1 <i>UBX3-mNeonGreen::TRP1, dsRed-HDEL::TRP1, dsc2::HIS3</i>                                                                                                         | this study                       | MWY296  |
| SEY6210 <i>UBX3-mNeonGreen::TRP1, dsRed-HDEL::TRP1, dsc2::HIS3</i>                                                                                                           | this study                       | MWY297  |
| SEY6210.1 <i>orm2::TRP1-3xFLAG-ORM2</i>                                                                                                                                      | this study                       | TMY002  |
| SEY6210.1 <i>orm2::TRP1-3xFLAG-ORM2<sup>K25R,K33R</sup></i>                                                                                                                  | this study                       | TMY008  |
| SEY6210.1 <i>orm2::TRP1-3xFLAG-ORM2, tul1::HIS3</i>                                                                                                                          | this study                       | TMY019  |
| SEY6210.1 <i>hmx1::3xFLAG-HMX1-TRP1, pdr5::HIS3</i>                                                                                                                          | this study                       | VNY045  |
| SEY6210.1 <i>hmx1::3xFLAG-HMX1-TRP1, ubx3::HIS3</i>                                                                                                                          | this study                       | VNY047  |
| SEY6210.1 <i>hmx1::3xFLAG-HMX1-TRP1, dsc2::HIS3</i>                                                                                                                          | this study                       | VNY053  |
| SEY6210.1 <i>hmx1::3xFLAG-HMX1-TRP1, vps4::TRP1</i>                                                                                                                          | this study                       | VNY055  |
| SEY6210.1 <i>hmx1::3xFLAG-HMX1-TRP1, pdr5::HIS3, vps4::TRP1</i>                                                                                                              | this study                       | VNY060  |
| SEY6210.1 <i>hmx1::3xFLAG-HMX1-TRP1, tul1::HIS3, vps4::TRP1</i>                                                                                                              | this study                       | VNY066  |
| SEY6210.1 <i>hmx1::3xFLAG-HMX1-TRP1, dsc3::HIS3</i>                                                                                                                          | this study                       | VNY067  |
| SEY6210.1 <i>hmx1::3xFLAG-HMX1-TRP1, gld1::HIS3</i>                                                                                                                          | this study                       | VNY069  |
| SEY6210.1 <i>hmx1::3xFLAG-HMX1-TRP1, vld1::HIS3</i>                                                                                                                          | this study                       | VNY071  |
| SEY6210.1 <i>ELO3-mCherry::TRP1, dsc2::HIS3, GFP-ORM2:TRP1</i>                                                                                                               | this study                       | BKY001  |
| SEY6210 <i>rsp5::HIS + rsp5(G747E)/pRS415</i>                                                                                                                                | <sup>7</sup>                     | YML981  |
| SEY6210 <i>tul1::NatR, rsp5::HIS + rsp5(G747E)/pRS415</i>                                                                                                                    | Gift from M. Li                  | YXY462  |
| SUB280 <i>lys2-801 leu2-3,112 ura3-52 his3-Δ200 trp1-1 ubi1::TRP1, ubi2-Δ2:ura3, ubi3-Δub2, ubi4-Δ2::LEU2, pUB100-RSP31 (2μ, HIS3), pUB39-P<sup>CUP1</sup>-Ub (2μ, LYS2)</i> | <sup>8</sup> , gift from S. Leon | SUB280  |
| SUB280, <i>pUB39-P<sup>CUP1</sup>-Ub<sup>K11R</sup> (2μ, LYS2)</i>                                                                                                           | <sup>8</sup> , gift from S. Leon | SUB516  |
| SUB280, <i>pUB39-P<sup>CUP1</sup>-Ub<sup>K63R</sup> (2μ, LYS2)</i>                                                                                                           | <sup>8</sup> , gift from S. Leon | SUB413  |

|                                                                                                            |                                  |        |
|------------------------------------------------------------------------------------------------------------|----------------------------------|--------|
| SUB280, <i>pUBI46-P<sup>GAL1</sup>-Ub (2μ, URA3), pUBI15-P<sup>CUP1</sup>-Ub<sup>K48R</sup> (2μ, LYS2)</i> | <sup>8</sup> , gift from S. Leon | SUB333 |
| W303 wildtype ( <i>MATa leu2-3,112 trp1-1 can1-100 ura3-1 ade2-1 his3-11,15</i> )                          | Gift from F. Fröhlich            | ARY001 |
| W303 <i>P<sup>GAL1</sup>-DSC2::cloNAT, dsc3::HIS3</i>                                                      | this study                       | ARY005 |

| Primer for gene knock out / knock in                                                          | Used for strain:          | Primer name:        |
|-----------------------------------------------------------------------------------------------|---------------------------|---------------------|
| GGCTATTGTGGAGAAAAAGCCAACTAAAA<br>CCCGAACCCCTCTTCTTGACGGATCCCCGGG<br>TTAATTAA                  | YWY050 / YW146            | UBX3-354-STOP-F     |
| CTTTAGAATAAACGTTTTGAGATGACTATT<br>TTTGAAATTCCTTGAATTCGAGCTCGTTTA<br>AAC                       | YWY050 / YW118 /<br>YW146 | UBX3-KO-R           |
| CCAAAATATCTGACGTTAGCGGCATATAT<br>CCATCAGGAAATATTGTAATGGAACGCCT<br>GGACGAACGGATCCCCGGGTTAATTAA | YWY118                    | UBX3-TAG-F2         |
| CCTATTCGTCTATGGCTTCATTTGGCAAAA<br>TGTTCTAATGTGGTTAATGGGTCGGATCCC<br>CGGGTTAATTAA              | YWY089                    | YIF1-TAG-F          |
| GATAATAATAATGCGCATGAAATTAATC<br>CTCTCTTTGATCTCTTCAATCAAGAGAATT<br>CGAGCTCGTTTAAAC             | YWY089 /<br>YWY179        | YIF1-TAG-R          |
| CGCTACTGAGTATCAATAGCAGAAAACGA<br>AAACCAAAGGCCATACCAAGCGGATCCC<br>CGGGTTAATTAA                 | YWY179                    | YIF1-KO-F           |
| GCACAATATAACACAGCATATATACACAC<br>ACACACATAAAATAACCGCAAAACGGATC<br>CCCCGGGTTAATTAA             | YWY322                    | HMX1-KO-F           |
| GATATTATTTTCATGTATATATTATGTTTGT<br>ATTTAGACTTTTTTTTTTATACGGAATTCG<br>AGCTCGTTTAAAC            | YWY322 /<br>YWY329        | HMX1-KO-R           |
| AGTTTACTAGAGCATCGTCG                                                                          | YWY329                    | HMX1-GT-F           |
| CAACGACATAAAAAGCAAACACAATAGTC<br>TACAAATAATGcgtacgctgcaggtcgac                                | ARY003                    | Dsc2 N-tag pYM<br>F |
| TGACGGGCATAGCCGTAAGCCCCACAGGA<br>GGCTCCATAGAcatcgatgaattctctgctg                              | ARY003                    | Dsc2 N-tag pYM<br>R |
| CCCTAGAGGCAAGATTGTAGCTGAAGCTG<br>G                                                            | TMY002 / TMY008           | ORM2-integr-R       |
| TTCTGCGAATGCGTGACCGTATCCGCAAA<br>GAAC<br>GAAGATTAAATTTAGGGCGGATCCCCGGG<br>TTAA<br>TTAA        | TMY002 / TMY008           | ORM2-INT-LG-F       |

| Primer for plasmid cloning       | Used for plasmid(s):                                | Primer name:    |
|----------------------------------|-----------------------------------------------------|-----------------|
| gcggagctcGTGCTAATTCATCTAGCAACTGG | pYW133 and<br>pYW150 and all<br>derivatives thereof | SacI-Dsc2-200-F |

|                                                           |                                                                    |                 |
|-----------------------------------------------------------|--------------------------------------------------------------------|-----------------|
| cgcaactagtGGCTGCAAGTGGATGTTTG                             | pYW133 and pYW150 and all derivatives thereof                      | Dsc2-SpeI-R     |
| CTGCAGACCTACCATCAATACgcCgcTCTGC TCATATTCCAGTTCTGC         | pYW150, pNM003                                                     | Dsc2-Y53R54A-F  |
| GCAGAACTGGAATATGAGCAGAgcGgcGTA TTGATGGTAGGTCTGCAG         | pYW150, pNM003                                                     | Dsc2-Y53R54A-R  |
| GAAGAGGAATTACGTCGTCGTTTGACCGA ATGATTTATATCAGCATATAACC     | pYW212, pNM003                                                     | tYW-Dsc2-ALFA-F |
| CGACGACGTAATTCCTCTTCCAACCTGGAG GGTCTCCTAAAGGTATCCAAAATTGG | pYW212, pNM003                                                     | tYW-Dsc2-ALFA-R |
| gcggagctcGTATTGTGATCTTGGGCGC                              | pYW185, pYW242, pYW243 and all derivatives thereof                 | SacI-HMX1-F     |
| gcgggatccGGCAACAAGGATCACTGG                               | pYW185, pYW242, pYW243 and all derivatives thereof                 | BamHI-HMX1-R    |
| cacacacataAAATAACCGCAAAAATGGACTAC AAAGACCATGACGG          | pYW185                                                             | pHMX1-FLAG-F    |
| CCGTCATGGTCTTTGTAGTCCATTTTTGCG GTTATTTtatgtgtgtg          | pYW185                                                             | pHMX1-FLAG-R    |
| CAAGGATGACGATGACAAGGAGGACAGT AGCAATACAATCATAAC            | pYW185                                                             | 3xFLAG-HMX1-F   |
| GTATGATTGTATTGCTACTGTCCCTCCTTGT CATCGTCATCCTTG            | pYW185                                                             | 3xFLAG-HMX1-R   |
| cacacacataAAATAACCGCAAAAATGGTGAGC AAGGGCG                 | pYW242, pYW243                                                     | p(HMX1)-Fluo-F  |
| CGCCCTTGCTCACCATTTTTGCGGTTATTTt atgtgtgtg                 | pYW242, pYW243                                                     | p(HMX1)-Fluo-R  |
| GCATGGACGAGCTGTACAAGGGCAAGTTC AGCTTCAAG                   | pYW242                                                             | HMX1-264-317-F  |
| CTTGAAGCTGAACTTGCCCTTGACAGCTC GTCCATGC                    | pYW242                                                             | HMX1-264-317-R  |
| GCATGGACGAGCTGTACAAGTCTGCTACT AGAAGAGCACTCC               | pYW243                                                             | HMX1-284-317-F  |
| GGAGTGCTCTTCTAGTAGCAGACTTGACA GCTCGTCCATGC                | pYW243                                                             | HMX1-284-317-R  |
| GAAGAGGAATTACGTCGTCGTTTGACCGA ACCCGGCAAGTTCAGCTTCAAG      | pYW257 and all derivatives thereof                                 | ALFA-264-F      |
| GAAGAGGAATTACGTCGTCGTTTGACCGA ACCCTCTGCTACTAGAAGAGCACTCC  | pYW258 and all derivatives thereof                                 | ALFA-284-F      |
| CGACGACGTAATTCCTCTTCCAACCTGGAG GGCTTGACAGCTCGTCCATGC      | pYW257, pYW258, pYW292 and all derivatives thereof, pYW283, pYW302 | ALFA-FLUO-R     |
| GTTTGACCGAACCCGGCAgGTTTCAGCTTCA GGTGTATTACG               | pYW261                                                             | ALFA-264-2KR-F  |
| CGTAATACACCTGAAGCTGAACcTGCCGG GTTCGGTCAAAC                | pYW261                                                             | ALFA-264-2KR-R  |
| GAATGGATGTTCAACAAGGATTCTGCTACT AG                         | pYW261                                                             | HMX1-K281R-F    |

|                                                                                                                                          |                                   |                      |
|------------------------------------------------------------------------------------------------------------------------------------------|-----------------------------------|----------------------|
| CTAGTAGCAGAATCCcTGTTGAACATCCAT<br>TC                                                                                                     | pYW261                            | HMX1-K281R-R         |
| CTTAGTTTCGACGGATTCTAGAATGAGTAA<br>AGGAGAAGAACTTTTCACTGG                                                                                  | pYW263                            | pTDH3-pH-F           |
| CCAGTGAAAAGTTCTTCTCCTTTACTCATT<br>CTAGAATCCGTCGAAACTAAG                                                                                  | pYW263                            | pTDH3-pH-R           |
| CATGGCATGGATGAACTATACAAACCCTC<br>CAGGTTGGAAGAG                                                                                           | pYW263                            | pH-ALFA-F            |
| CTCTTCCAACCTGGAGGGTTTGTATAGTTC<br>ATCCATGCCATG                                                                                           | pYW263                            | pH-ALFA-R            |
| GAGCACTCCACACGGTCATTCTTGTCATGC<br>TGCTGGTGCTTTC                                                                                          | pYW290                            | HMX1-N+3-F           |
| GAAAGCACCAGCAGCATGACAAGAATGAC<br>CGTGTGGAGTGCTC                                                                                          | pYW290                            | HMX1-N+3-R           |
| GAAGAGGAATTACGTCGTCGTTTGACCGA<br>ACCCGAGGACAGTAGCAATACAATCATA<br>CGACGACGTAATTCCTCTTCCAACCTGGAG<br>GGCATTCTAGAATCCGTCGAAACTAAGTT<br>CTGG | pYW292, pYW311                    | ALFA-HMX1-FL-<br>F   |
| GCGctcgagATGGTGAGCAAGGGCG                                                                                                                | pYW311                            | pTDH3-ALFA-R         |
| GCGggtaccGGCAACAAGGATCACTGG                                                                                                              | pYW292, pIS099,<br>pIS100, pIS101 | XhoI-eGFP-F          |
| GAAGAGCACTCCACACGgtaatcctgGTCATTC<br>TTGTCATGCTGC                                                                                        | pYW292, pIS099,<br>pIS100, pIS101 | HMX1-KpnI-R          |
| GCAGCATGACAAGAATGACcaggattacCGTG<br>TGGAGTGCTCTTC                                                                                        | pYW300                            | HMX1-N+6-F           |
| CATGCGGTACCAAAAACGTTCTGCTACTA<br>GAAGAGCACTCC                                                                                            | pYW300                            | HMX1-N+6-R           |
| GGAGTGCTCTTCTAGTAGCAGAACGTTTTT<br>GGTACCGCATG                                                                                            | pYW302                            | Pep12-Hmx1-<br>TMD-F |
| CGTTTGACCGAACCCCTCGGAAGACGAATT<br>TTTTGG                                                                                                 | pYW302                            | Pep12-Hmx1-<br>TMD-R |
|                                                                                                                                          | pYW283, pYW302                    | ALFA-Pep12-F         |

| Plasmids                                                         | SOURCE                    | IDENTIFIER            |
|------------------------------------------------------------------|---------------------------|-----------------------|
| gene deletion(/insertion) cassette <i>HIS3</i>                   | 9                         | pFA6a-HIS3            |
| gene deletion(/insertion) cassette <i>TRP1</i>                   | 9                         | pFA6a-TRP1            |
| gene insertion cassette <i>3xFLAG::HIS3</i>                      | Gift from Scott D.<br>Emr | pFA6a-3xFLAG-<br>HIS3 |
| empty centromer vector <i>HIS3</i>                               | 10                        | pRS413                |
| empty centromer vector <i>TRP1</i>                               | 10                        | pRS414                |
| empty centromer vector <i>LEU2</i>                               | 10                        | pRS415                |
| empty centromer vector <i>URA3</i>                               | 10                        | pRS416                |
| yeast integrative plasmid (YIp) <i>URA3</i>                      | 10                        | pRS406                |
| pRS416 - <i>VPS4-3xHA</i>                                        | 6                         | pDT82                 |
| pRS416 - <i>VPS4-3xHA<sup>E233Q</sup></i> (endogenous 5' and 3') | 6                         | pDT84                 |
| pRS415 - <i>VPS4</i> (endogenous 5' and 3')                      | 6                         | pOS014                |
| pRS415 - <i>VPS4<sup>E233Q</sup></i> (endogenous 5' and 3')      | 6                         | pOS015                |
| pRS416 - <i>3xFLAG-ORM2</i> (endogenous 5' and 3')               | 4                         | pOS129                |
| pRS415 - <i>GFP-ORM2</i> (endogenous 5' and 3')                  | 4                         | pOS173                |

|                                                                                                   |                                   |        |
|---------------------------------------------------------------------------------------------------|-----------------------------------|--------|
| pRS415 - <i>P<sup>TDH3</sup>-GFP-ORM2</i>                                                         | this study                        | pOS200 |
| pRS415 - <i>P<sup>TPII</sup>-mCherry-CPS1</i>                                                     | <sup>6</sup>                      | pOS246 |
| pRS416 - <i>ORM2</i> (endogenous 5' and 3')                                                       | 4                                 | pVB17  |
| pRS416 - <i>GFP-ORM2</i> (endogenous 5' and 3')                                                   | 4                                 | pYW006 |
| pRS416 - <i>3xFLAG-ORM2<sup>K25R,K33R</sup></i> (endogenous 5' and 3')                            | 4                                 | pYW015 |
| pRS416 - <i>GFP-ORM2<sup>K25R,K33R</sup></i> (endogenous 5' and 3')                               | 4                                 | pYW028 |
| pRS416 - <i>TUL1</i> (endogenous 5' and 3')                                                       | 4                                 | pYW060 |
| pRS415 - <i>DSC2</i> (endogenous 5' and 3')                                                       | this study                        | pYW133 |
| pRS415 - <i>DSC2<sup>Y53A,R54A</sup></i> (endogenous 5' and 3')                                   | this study                        | pYW150 |
| pRS416 - <i>3xFLAG-HMX1</i> (endogenous 5' and 3')                                                | this study                        | pYW185 |
| pRS415 - <i>DSC2-ALFA</i> (endogenous 5' and 3')                                                  | this study                        | pYW212 |
| pRS416 - <i>eGFP-HMX1(264-317)</i> (endogenous 5' and 3')                                         | this study                        | pYW242 |
| pRS416 - <i>eGFP-HMX1(284-317)</i> (endogenous 5' and 3')                                         | this study                        | pYW243 |
| pRS416 - <i>P<sup>TDH3</sup>-eGFP-HMX1(284-317)</i> (endogenous 3')                               | this study                        | pYW255 |
| pRS416 - <i>P<sup>TDH3</sup>-eGFP-ALFA-HMX1(264-317)</i> (endogenous 3')                          | this study                        | pYW257 |
| pRS416 - <i>P<sup>TDH3</sup>-eGFP-ALFA-HMX1(284-317)</i> (endogenous 3')                          | this study                        | pYW258 |
| pRS416 - <i>P<sup>TDH3</sup>-eGFP-ALFA-HMX1<sup>K265,269,282R</sup></i> (264-317) (endogenous 3') | this study                        | pYW261 |
| pRS416 - <i>P<sup>TDH3</sup>-pHluorin-ALFA-HMX1(264-317)</i> (endogenous 3')                      | this study                        | pYW263 |
| pRS416 - <i>P<sup>TDH3</sup>-eGFP-ALFA-PEP12</i> (endogenous 3')                                  | this study                        | pYW283 |
| pRS416 - <i>P<sup>TDH3</sup>-eGFP-ALFA-HMX1(264-317) T292_V293insVIL</i> (endogenous 3')          | this study                        | pYW290 |
| pRS416 - <i>yZ3EV- P<sup>Z3EV</sup>-mNeonGreen-ALFA-HMX1</i>                                      | this study; gift from D. Botstein | pYW292 |
| pRS416 - <i>P<sup>TDH3</sup>-eGFP-ALFA-HMX1(264-317) T292_V293insVILVIL</i> (endogenous 3')       | this study                        | pYW300 |
| pRS416 - <i>P<sup>TDH3</sup>-eGFP-ALFA-PEP12(2-263)-HMX1(284-317) (HMX1 3')</i>                   | this study                        | pYW302 |
| pRS416 - <i>P<sup>TDH3</sup>-ALFA-HMX1</i> (endogenous 3')                                        | this study                        | pYW311 |
| pRS410 - <i>3xFLAG-HMX1</i> (endogenous 5' and 3')                                                | this study                        | pAP117 |
| pRS418 - <i>VPS4<sup>E233Q</sup></i> (endogenous 5' and 3')                                       | <sup>6</sup> , this study         | pAP118 |
| pRS416 - <i>yZ3EV- P<sup>Z3EV</sup>-mNeonGreen-ALFA-HMX1(264-317)</i>                             | this study; gift from D. Botstein | pIS099 |
| pRS416 - <i>yZ3EV- P<sup>Z3EV</sup>-mNeonGreen-ALFA-HMX1(264-317) T292_V293insVIL</i>             | this study; gift from D. Botstein | pIS100 |
| pRS416 - <i>yZ3EV- P<sup>Z3EV</sup>-mNeonGreen-ALFA-HMX1(264-317) T292_V293insVILVIL</i>          | this study; gift from D. Botstein | pIS101 |
| pRS414 - <i>yZ3EV- P<sup>Z3EV</sup>-eGFP-ALFA-HMX1</i>                                            | this study; gift from D. Botstein | pKS022 |
| pRS415 - <i>DSC2<sup>Y53A,R54A</sup>-ALFA</i> (endogenous 5' and 3')                              | this study                        | pNM003 |
| pRS415 - <i>Vps4-3xHA-mCherry</i>                                                                 | <sup>11</sup>                     | pSS52  |



|                                                             |                                   |                         |
|-------------------------------------------------------------|-----------------------------------|-------------------------|
| pRS414- <i>P<sup>TDH3</sup>-mCherry-CPS1<sup>Δ250</sup></i> | 12                                | pMM29                   |
| <i>GAL1pr::natNT2</i>                                       | gift from F. Föhlich              | pYM-N23                 |
| <i>YIP(TRP1)-MNN9pr-MNN9-mTagBFP2</i>                       | gift from Z. Xie                  | RRID:<br>Addgene_133662 |
| <i>YIP(URA3)-SEC7pr-SEC7-6xmCherry</i>                      | <sup>4</sup> ; gift from B. Glick | RRID:<br>Addgene_105267 |

| <b>Software and Algorithms</b>    | <b>SOURCE</b>                       | <b>IDENTIFIER</b>         |
|-----------------------------------|-------------------------------------|---------------------------|
| GIMP                              | GIMP Development Team               | Version 2.10              |
| Inkscape                          | Inkscape Project                    | Version 1.3.1             |
| Proteome Discoverer 2.5           | Thermo Scientific                   | Version 2.5               |
| Excel                             | Microsoft                           | Version<br>16.0.5422.1000 |
| Word                              | Microsoft                           | Version<br>16.0.5413.1000 |
| ImageJ                            | Schneider et al. 2012 <sup>13</sup> | Version 1.54g             |
| Visi View                         | Visitron                            | Version 2.1.4             |
| Leica Application Suite X (LAS X) | Leica                               | Version<br>3.9.1.28433    |
| R Studio                          | Posit PBC                           | Version 2023.09.1<br>+494 |
| PyMOL                             | Schrodinger LLC                     | Version 2.5.4             |
| Prism                             | GraphPad                            | Version 10.1.2            |

Supplementary Table 3.

**MD Simulation checklist**

| <b>Reliability and reproducibility checklist for molecular dynamics simulations</b><br>*All boxes must be marked YES by acceptance unless “Response not needed if No”.                                                                   | <b>Yes</b>                          | <b>No</b>                | <b>Response</b><br>(Please state where this information can be found in the text)                                                                                                                                                                         |
|------------------------------------------------------------------------------------------------------------------------------------------------------------------------------------------------------------------------------------------|-------------------------------------|--------------------------|-----------------------------------------------------------------------------------------------------------------------------------------------------------------------------------------------------------------------------------------------------------|
| <b>1. Convergence of simulations and analysis</b>                                                                                                                                                                                        |                                     |                          |                                                                                                                                                                                                                                                           |
| 1a. Is an evaluation presented in the text to show that the property being measured has equilibrated in the simulations ( <i>e.g.</i> time-course analysis)?                                                                             | <input checked="" type="checkbox"/> | <input type="checkbox"/> | The precise temporal evolution of these properties after the equilibration phase was appended. From these data, it should be possible to observe the convergence, as they are visually stable. (membrane thinning videos, and the supplementary figure 6) |
| 1b. Then, is it described in the text how simulations are split into equilibration and production runs and how much data were analyzed from production runs?                                                                             | <input checked="" type="checkbox"/> | <input type="checkbox"/> | (SI ‘Supplementary Methods for MD Simulations’ session, also shortly repeated in discussion)                                                                                                                                                              |
| 1c. Are there at least 3 simulations per simulation condition with statistical analysis?                                                                                                                                                 | <input checked="" type="checkbox"/> | <input type="checkbox"/> | (SI ‘Supplementary Methods for MD Simulations’ session)                                                                                                                                                                                                   |
| 1d. Is evidence provided in the text that the simulation results presented are independent of initial configuration?                                                                                                                     | <input checked="" type="checkbox"/> | <input type="checkbox"/> | For the three or more repeats we tried, provided that the membrane is stabilized and the protein is not affected by inhomogeneity near the edges, the results are reproducible. (SI ‘Supplementary Methods for MD Simulations’ session)                   |
| <b>2. Connection to experiments</b>                                                                                                                                                                                                      |                                     |                          |                                                                                                                                                                                                                                                           |
| 2a. Are calculations provided that can connect to experiments ( <i>e.g.</i> loss or gain in function from mutagenesis, binding assays, NMR chemical shifts, J-couplings, SAXS curves, interaction distances or FRET distances, structure | <input checked="" type="checkbox"/> | <input type="checkbox"/> | From a variety of arbitrary starting points, we can demonstrate the thinning of the membrane and the binding of truncated lipids,                                                                                                                         |

|                                                                                                                                                                                                                                                                                                                      |                                     |                                     |                                                                                                                                                                                                                                                                                                                                                                                |
|----------------------------------------------------------------------------------------------------------------------------------------------------------------------------------------------------------------------------------------------------------------------------------------------------------------------|-------------------------------------|-------------------------------------|--------------------------------------------------------------------------------------------------------------------------------------------------------------------------------------------------------------------------------------------------------------------------------------------------------------------------------------------------------------------------------|
| factors, diffusion coefficients, bulk modulus and other mechanical properties, <i>etc.</i> )?                                                                                                                                                                                                                        |                                     |                                     | which align with the experimental findings and are consistent with the substrate recognition hypothesis.<br>(discussion on membrane thinning in the main text and on truncated lipid association in SI)                                                                                                                                                                        |
| <b>3. Method choice</b>                                                                                                                                                                                                                                                                                              |                                     |                                     |                                                                                                                                                                                                                                                                                                                                                                                |
| 3a. Do simulations contain membranes, membrane proteins, intrinsically disordered proteins, glycans, nucleic acids, polymers, or cryptic ligand binding?                                                                                                                                                             | <input checked="" type="checkbox"/> | <input type="checkbox"/>            | (SI ‘Supplementary Methods for MD Simulations’ session)                                                                                                                                                                                                                                                                                                                        |
| 3b. Is it described in the text whether the accuracy of the chosen model(s) is sufficient to address the question(s) under investigation (e.g. all-atom vs. coarse-grained models, fixed charge vs. polarizable force fields, implicit vs. explicit solvent or membrane, force field and water model, <i>etc.</i> )? | <input checked="" type="checkbox"/> | <input type="checkbox"/>            | The most accurate setting is employed, utilising all-atom, explicit solvent and membrane models. The force fields have fixed charge, as previous work in our group demonstrated that the polarizable force fields would be too slow to converge even for a simpler system and the secondary structure also risks to break.<br>(details in SI for the sake of reference limits) |
| 3c. Is the timescale of the event(s) under investigation beyond the brute-force MD simulation timescale in this study that enhanced sampling methods are needed?                                                                                                                                                     | <input type="checkbox"/>            | <input checked="" type="checkbox"/> | The converged statistics were obtained within a reasonable timeframe using the classical molecular dynamics (MD) method. Enhanced sampling was not employed, as it would be necessary to conduct connected classical MD in order to recover the energy landscape in such a case.<br>(SI ‘Supplementary Methods for MD Simulations’ session)                                    |
| If <b>YES</b> , are the parameters and convergence criteria for the enhanced sampling method clearly stated?                                                                                                                                                                                                         | <input type="checkbox"/>            | <input type="checkbox"/>            |                                                                                                                                                                                                                                                                                                                                                                                |
| If <b>NO</b> , is the evidence provided in the text?                                                                                                                                                                                                                                                                 | <input checked="" type="checkbox"/> | <input type="checkbox"/>            | (SI ‘Supplementary Methods for MD Simulations’ session)                                                                                                                                                                                                                                                                                                                        |
| <b>4. Code and reproducibility</b>                                                                                                                                                                                                                                                                                   |                                     |                                     |                                                                                                                                                                                                                                                                                                                                                                                |
| 4a. Is a table provided describing the system setup that includes simulation box dimensions, total number of atoms,                                                                                                                                                                                                  | <input checked="" type="checkbox"/> | <input type="checkbox"/>            | Lipid compositions are described. The remaining                                                                                                                                                                                                                                                                                                                                |

|                                                                                                                                                                                            |                                     |                                     |                                                                                                                                               |
|--------------------------------------------------------------------------------------------------------------------------------------------------------------------------------------------|-------------------------------------|-------------------------------------|-----------------------------------------------------------------------------------------------------------------------------------------------|
| total number of water molecules, salt concentration, lipid composition (number of molecules and type)?                                                                                     |                                     |                                     | numbers are a consequence of the box described in SI. (SI ‘Supplementary Methods for MD Simulations’ session)                                 |
| 4b. Is it described in the text what simulation and analysis software and which versions are used?                                                                                         | <input checked="" type="checkbox"/> | <input type="checkbox"/>            | (SI ‘Supplementary Methods for MD Simulations’ session)                                                                                       |
| 4c. Are other parameters for the system setup described in the text, such as protonation state, type of structural restraints if applied, nonbonded cutoff, thermostat and barostat, etc.? | <input checked="" type="checkbox"/> | <input type="checkbox"/>            | The protocol to obtain the protonation state and structural restraints are described. (SI ‘Supplementary Methods for MD Simulations’ session) |
| 4d. Are initial coordinate and simulation input files and a coordinate file of the final output provided as supplementary files or in a public repository?                                 | <input checked="" type="checkbox"/> | <input type="checkbox"/>            | 10.5281/zenodo.13889274<br>10.5281/zenodo.13889576                                                                                            |
| 4e. Is there custom code or custom force field parameters?                                                                                                                                 | <input type="checkbox"/>            | <input checked="" type="checkbox"/> |                                                                                                                                               |
| <input type="checkbox"/> If <b>YES</b> , are they provided as supplementary files or in a public repository?                                                                               | <input type="checkbox"/>            | <input type="checkbox"/>            |                                                                                                                                               |

## Supplementary Methods

### Supplementary Methods for MD Simulations

We retrieved the Dsc2 starting structure from the AlphaFold Protein Structure Database (<https://alphafold.ebi.ac.uk/>, accession: AF Q08232 F1). We focused the analysis on the rhomboid like domain of Dsc2, and therefore omitted an  $\beta$ -sheet (aa 148 – 182) that connects TM3 with TM4 as well as the undefined C-terminal portion (aa 241 – 322). Omitting these regions also accelerate the convergence of the simulation. Preparation and equilibration for the systems packed in membranes and aqueous phases are detailed in SI. Preparation of the initial structure, comprising the protonation and minimization were conducted in the MOE platform (Molecular Operating Environment, version 2022.02, Molecular Computing Group Inc, Montreal, Canada). Dsc2 was oriented in the membrane using PPM 2.0<sup>14</sup> and embedded in a lipid bilayer comprising 45% POPC, 45% POPE and 10% cholesterol with the CHARMM-GUI Membrane Builder<sup>15</sup>. A 75 Å\*75 Å membrane with a default 22.5 Å aqueous layer was added to ensure the efficient embedding of the Dsc2 and minimize artificial interference among neighboring images during the simulation. The resulting system was parameterized with LEaP from the AmberTools23<sup>16</sup> using TIP3P<sup>17</sup>, FF14SB<sup>18</sup> and Lipid21<sup>19</sup> as force fields for water, protein and lipids. We equilibrated the system by minimizing gradually all hydrogen atoms, heavy atoms of water, lipids and the protein. The system was then heated up from 100K to 300K, minimized to cool down before being heated up again to 300K. Finally, we equilibrated the system with 1ns isotropic position scaling followed by 10ns pressure scaling, as was suggested by previous studies<sup>20,21</sup>. After equilibration the system was simulated for 100ns with the Langevin thermostat and the Berendsen barostat. Asymmetric lipids are prepared by truncating the fatty acid chains following the previously described protocol<sup>22</sup>. To sample the preferred association sites of truncated lipids, we simulated an excessive amount of 6% truncated lipids close to but outside the first solvation shell of the dsc2. To further retrieve the statistics on associated lipids, we simulate the systems with single PC (C10:0;C16:0) or PC (C10:1;C16:0) at the sampled binding site, corresponding to 1%-2% of the total lipids sampled similar to the physiological condition. These systems with asymmetric lipids are simulated for 200ns, leading to an aggregated trajectory of 140ns\*3 per system before inhomogeneity at the edges of membrane disrupts the equilibrium. The last 40ns with stabilized binding statistics are used to plot the distance between dsc2 and truncated lipids. The equilibrated system was simulated with periodic boundary conditions using the SHAKE algorithm for hydrogens under constant pressure for 100ns with amber 22<sup>16</sup>. For non-bonding interactions a 8 Å cut off was applied and long-range electrostatics were estimated with the particle mesh Ewald method<sup>23</sup>.

We took the last 40ns where the simulation converges to obtain statistics on membrane thickness changes with the membplugin<sup>24</sup> and visualized the dynamics with VMD<sup>25</sup>.

## References

- 1 Tong, Z., Kim, M. S., Pandey, A. & Espenshade, P. J. Identification of candidate substrates for the Golgi Tull1 E3 ligase using quantitative diGly proteomics in yeast. *Mol Cell Proteomics* **13**, 2871-2882, doi:10.1074/mcp.M114.040774 (2014).
- 2 Robinson, J. S., Kliensky, D. J., Banta, L. M. & Emr, S. D. Protein sorting in *Saccharomyces cerevisiae*: isolation of mutants defective in the delivery and processing of multiple vacuolar hydrolases. *Mol Cell Biol* **8**, 4936-4948 (1988).
- 3 Babst, M., Sato, T. K., Banta, L. M. & Emr, S. D. Endosomal transport function in yeast requires a novel AAA-type ATPase, Vps4p. *EMBO J* **16**, 1820-1831, doi:10.1093/emboj/16.8.1820 (1997).
- 4 Schmidt, O. *et al.* Endosome and Golgi-associated degradation (EGAD) of membrane proteins regulates sphingolipid metabolism. *EMBO J* **38**, e101433, doi:10.15252/emboj.2018101433 (2019).
- 5 Moir, D., Stewart, S. E., Osmond, B. C. & Botstein, D. Cold-sensitive cell-division-cycle mutants of yeast: isolation, properties, and pseudoreversion studies. *Genetics* **100**, 547-563, doi:10.1093/genetics/100.4.547 (1982).
- 6 Schmidt, O. *et al.* TOR complex 2 (TORC2) signaling and the ESCRT machinery cooperate in the protection of plasma membrane integrity in yeast. *J Biol Chem*, doi:10.1074/jbc.RA120.013222 (2020).
- 7 Tardiff, D. F. *et al.* Yeast reveal a "druggable" Rsp5/Nedd4 network that ameliorates alpha-synuclein toxicity in neurons. *Science* **342**, 979-983, doi:10.1126/science.1245321 (2013).
- 8 Spence, J., Sadis, S., Haas, A. L. & Finley, D. A ubiquitin mutant with specific defects in DNA repair and multiubiquitination. *Mol Cell Biol* **15**, 1265-1273, doi:10.1128/MCB.15.3.1265 (1995).
- 9 Longtine, M. S. *et al.* Additional modules for versatile and economical PCR-based gene deletion and modification in *Saccharomyces cerevisiae*. *Yeast* **14**, 953-961 (1998).
- 10 Sikorski, R. S. & Hieter, P. A system of shuttle vectors and yeast host strains designed for efficient manipulation of DNA in *Saccharomyces cerevisiae*. *Genetics* **122**, 19-27 (1989).
- 11 Adell, M. A. Y. *et al.* Recruitment dynamics of ESCRT-III and Vps4 to endosomes and implications for reverse membrane budding. *Elife* **6**, doi:10.7554/eLife.31652 (2017).
- 12 Muller, M. *et al.* The coordinated action of the MVB pathway and autophagy ensures cell survival during starvation. *Elife* **4**, e07736, doi:10.7554/eLife.07736 (2015).
- 13 Schneider, C. A., Rasband, W. S. & Eliceiri, K. W. NIH Image to ImageJ: 25 years of image analysis. *Nat Methods* **9**, 671-675, doi:10.1038/nmeth.2089 (2012).
- 14 Lomize, M. A., Pogozheva, I. D., Joo, H., Mosberg, H. I. & Lomize, A. L. OPM database and PPM web server: resources for positioning of proteins in membranes. *Nucleic Acids Res* **40**, D370-376, doi:10.1093/nar/gkr703 (2012).
- 15 Wu, E. L. *et al.* CHARMM-GUI Membrane Builder toward realistic biological membrane simulations. *J Comput Chem* **35**, 1997-2004, doi:10.1002/jcc.23702 (2014).
- 16 Case, D. A. *et al.* AmberTools. *J Chem Inf Model* **63**, 6183-6191, doi:10.1021/acs.jcim.3c01153 (2023).

- 17 Jorgensen, W. L., Chandrasekhar, J., Madura, J. D., Impey, R. W. & Klein, M. L. Comparison of simple potential functions for simulating liquid water. *The Journal of Chemical Physics* **79**, 926-935, doi:10.1063/1.445869 (1983).
- 18 Maier, J. A. *et al.* ff14SB: Improving the Accuracy of Protein Side Chain and Backbone Parameters from ff99SB. *J Chem Theory Comput* **11**, 3696-3713, doi:10.1021/acs.jctc.5b00255 (2015).
- 19 Dickson, C. J., Walker, R. C. & Gould, I. R. Lipid21: Complex Lipid Membrane Simulations with AMBER. *J Chem Theory Comput* **18**, 1726-1736, doi:10.1021/acs.jctc.1c01217 (2022).
- 20 Monteleone, S. *et al.* Mechanisms Responsible for omega-Pore Currents in Ca(v) Calcium Channel Voltage-Sensing Domains. *Biophys J* **113**, 1485-1495, doi:10.1016/j.bpj.2017.08.010 (2017).
- 21 Fernandez-Quintero, M. L. *et al.* Structural determinants of voltage-gating properties in calcium channels. *Elife* **10**, doi:10.7554/eLife.64087 (2021).
- 22 Smith, P., Owen, D. M., Lorenz, C. D. & Makarova, M. Asymmetric glycerophospholipids impart distinctive biophysical properties to lipid bilayers. *Biophys J* **120**, 1746-1754, doi:10.1016/j.bpj.2021.02.046 (2021).
- 23 Salomon-Ferrer, R., Gotz, A. W., Poole, D., Le Grand, S. & Walker, R. C. Routine Microsecond Molecular Dynamics Simulations with AMBER on GPUs. 2. Explicit Solvent Particle Mesh Ewald. *J Chem Theory Comput* **9**, 3878-3888, doi:10.1021/ct400314y (2013).
- 24 Guixa-Gonzalez, R. *et al.* MEMBPLUGIN: studying membrane complexity in VMD. *Bioinformatics* **30**, 1478-1480, doi:10.1093/bioinformatics/btu037 (2014).
- 25 Humphrey, W., Dalke, A. & Schulten, K. VMD: visual molecular dynamics. *J Mol Graph* **14**, 33-38, 27-38, doi:10.1016/0263-7855(96)00018-5 (1996).
